# Supplementary material for: Impact of Nonpharmaceutical Interventions during the COVID-19 Pandemic on the Prevalence of Respiratory Syncytial Virus in Hospitalized Children with Lower Respiratory Tract Infections: A Systematic Review and Meta-Analysis
Source: MDPI journal article supplement (doi:10.3390/v16030429), 2024-03-11
Supplement: s1 [file s1]

# Supplementary Material SA.

**Table S1. Preferred reporting items for systematic reviews and meta-analyses (PRISMA) 2020 checklist.**

| Section and Topic             | Item # | Checklist item                                                                                                                                                                                                                                                                                       | Location where item is reported                 |
|-------------------------------|--------|------------------------------------------------------------------------------------------------------------------------------------------------------------------------------------------------------------------------------------------------------------------------------------------------------|-------------------------------------------------|
| <b>TITLE</b>                  |        |                                                                                                                                                                                                                                                                                                      |                                                 |
| Title                         | 1      | Identify the report as a systematic review.                                                                                                                                                                                                                                                          | Title                                           |
| <b>ABSTRACT</b>               |        |                                                                                                                                                                                                                                                                                                      |                                                 |
| Abstract                      | 2      | See the PRISMA 2020 for Abstracts checklist.                                                                                                                                                                                                                                                         | Abstract                                        |
| <b>INTRODUCTION</b>           |        |                                                                                                                                                                                                                                                                                                      |                                                 |
| Rationale                     | 3      | Describe the rationale for the review in the context of existing knowledge.                                                                                                                                                                                                                          | Introduction                                    |
| Objectives                    | 4      | Provide an explicit statement of the objective(s) or question(s) the review addresses.                                                                                                                                                                                                               | Introduction in the last paragraph and Methods. |
| <b>METHODS</b>                |        |                                                                                                                                                                                                                                                                                                      |                                                 |
| Eligibility criteria          | 5      | Specify the inclusion and exclusion criteria for the review and how studies were grouped for the syntheses.                                                                                                                                                                                          | Methods                                         |
| Information sources           | 6      | Specify all databases, registers, websites, organisations, reference lists and other sources searched or consulted to identify studies. Specify the date when each source was last searched or consulted.                                                                                            | Methods                                         |
| Search strategy               | 7      | Present the full search strategies for all databases, registers, and websites, including any filters and limits used.                                                                                                                                                                                | Table S2 in Supplementary Material.             |
| Selection process             | 8      | Specify the methods used to decide whether a study met the inclusion criteria of the review, including how many reviewers screened each record and each report retrieved, whether they worked independently, and if applicable, details of automation tools used in the process.                     | Methods                                         |
| Data collection process       | 9      | Specify the methods used to collect data from reports, including how many reviewers collected data from each report, whether they worked independently, any processes for obtaining or confirming data from study investigators, and if applicable, details of automation tools used in the process. | Methods                                         |
| Data items                    | 10a    | List and define all outcomes for which data were sought. Specify whether all results that were compatible with each outcome domain in each study were sought (e.g. for all measures, time points, analyses), and if not, the methods used to decide which results to collect.                        | Methods                                         |
|                               | 10b    | List and define all other variables for which data were sought (e.g. participant and intervention characteristics, funding sources). Describe any assumptions made about any missing or unclear information.                                                                                         | Methods                                         |
| Study risk of bias assessment | 11     | Specify the methods used to assess risk of bias in the included studies, including details of the tool(s) used, how many reviewers assessed each study and whether they worked independently, and if applicable, details of automation tools used in the process.                                    | Methods. Tables S3 and S4 in Supplementary      |

| Section and Topic         | Item # | Checklist item                                                                                                                                                                                                                                              | Location where item is reported                                     |
|---------------------------|--------|-------------------------------------------------------------------------------------------------------------------------------------------------------------------------------------------------------------------------------------------------------------|---------------------------------------------------------------------|
|                           |        |                                                                                                                                                                                                                                                             | Material.                                                           |
| Effect measures           | 12     | Specify for each outcome the effect measure(s) (e.g. risk ratio, mean difference) used in the synthesis or presentation of results.                                                                                                                         | Methods                                                             |
| Synthesis methods         | 13a    | Describe the processes used to decide which studies were eligible for each synthesis (e.g. tabulating the study intervention characteristics and comparing against the planned groups for each synthesis (item #5)).                                        | Methods                                                             |
|                           | 13b    | Describe any methods required to prepare the data for presentation or synthesis, such as handling of missing summary statistics, or data conversions.                                                                                                       | Methods                                                             |
|                           | 13c    | Describe any methods used to tabulate or visually display results of individual studies and syntheses.                                                                                                                                                      | Methods                                                             |
|                           | 13d    | Describe any methods used to synthesize results and provide a rationale for the choice(s). If meta-analysis was performed, describe the model(s), method(s) to identify the presence and extent of statistical heterogeneity, and software package(s) used. | Methods                                                             |
|                           | 13e    | Describe any methods used to explore possible causes of heterogeneity among study results (e.g. subgroup analysis, meta-regression).                                                                                                                        | Methods                                                             |
|                           | 13f    | Describe any sensitivity analyses conducted to assess robustness of the synthesized results.                                                                                                                                                                | Methods                                                             |
| Reporting bias assessment | 14     | Describe any methods used to assess risk of bias due to missing results in a synthesis (arising from reporting biases).                                                                                                                                     | Not applicable because this review has no missing data.             |
| Certainty assessment      | 15     | Describe any methods used to assess certainty (or confidence) in the body of evidence for an outcome.                                                                                                                                                       | Methods in the last paragraph. Table S10 in Supplementary Material. |
| <b>RESULTS</b>            |        |                                                                                                                                                                                                                                                             |                                                                     |
| Study selection           | 16a    | Describe the results of the search and selection process, from the number of records identified in the search to the number of studies included in the review, ideally using a flow diagram.                                                                | Figure 1                                                            |
|                           | 16b    | Cite studies that might appear to meet the inclusion criteria, but which were excluded, and explain why they were excluded.                                                                                                                                 | Appendix A.                                                         |
| Study characteristics     | 17     | Cite each included study and present its characteristics.                                                                                                                                                                                                   | Results Table 1. Tables S6 and S7 in Supplementary Material.        |
| Risk of bias in studies   | 18     | Present assessments of risk of bias for each included study.                                                                                                                                                                                                | Tables S3 and S4 in Supplementary                                   |

| Section and Topic             | Item # | Checklist item                                                                                                                                                                                                                                                                       | Location where item is reported                                                  |
|-------------------------------|--------|--------------------------------------------------------------------------------------------------------------------------------------------------------------------------------------------------------------------------------------------------------------------------------------|----------------------------------------------------------------------------------|
|                               |        |                                                                                                                                                                                                                                                                                      | Material.                                                                        |
| Results of individual studies | 19     | For all outcomes, present, for each study: (a) summary statistics for each group (where appropriate) and (b) an effect estimate and its precision (e.g. confidence/credible interval), ideally using structured tables or plots.                                                     | Results Table 2 and Figure 2. Tables S8 and Figure S1 in Supplementary Material. |
| Results of syntheses          | 20a    | For each synthesis, briefly summarise the characteristics and risk of bias among contributing studies.                                                                                                                                                                               | Results Table 2 and Table S9 in Supplementary Material. Discussion section.      |
|                               | 20b    | Present results of all statistical syntheses conducted. If meta-analysis was done, present for each the summary estimate and its precision (e.g. confidence/credible interval) and measures of statistical heterogeneity. If comparing groups, describe the direction of the effect. | Results Table 2 and Figure 2. Tables S8 and Figure S1 in Supplementary Material. |
|                               | 20c    | Present results of all investigations of possible causes of heterogeneity among study results.                                                                                                                                                                                       | Results Table 2. Tables S8 and S9 and Figure S3 in Supplementary Material.       |
|                               | 20d    | Present results of all sensitivity analyses conducted to assess the robustness of the synthesized results.                                                                                                                                                                           | Table S8 in Supplementary Material.                                              |
| Reporting biases              | 21     | Present assessments of risk of bias due to missing results (arising from reporting biases) for each synthesis assessed.                                                                                                                                                              | Not applicable because this review has no missing data.                          |
| Certainty of                  | 22     | Present assessments of certainty (or confidence) in the body of evidence for each outcome assessed.                                                                                                                                                                                  | Table S10 in                                                                     |

| Section and Topic                              | Item # | Checklist item                                                                                                                                                                                                                             | Location where item is reported                          |
|------------------------------------------------|--------|--------------------------------------------------------------------------------------------------------------------------------------------------------------------------------------------------------------------------------------------|----------------------------------------------------------|
| evidence                                       |        |                                                                                                                                                                                                                                            | Supplementary Material.                                  |
| <b>DISCUSSION</b>                              |        |                                                                                                                                                                                                                                            |                                                          |
| Discussion                                     | 23a    | Provide a general interpretation of the results in the context of other evidence.                                                                                                                                                          | Discussion                                               |
|                                                | 23b    | Discuss any limitations of the evidence included in the review.                                                                                                                                                                            | Discussion                                               |
|                                                | 23c    | Discuss any limitations of the review processes used.                                                                                                                                                                                      | Discussion                                               |
|                                                | 23d    | Discuss implications of the results for practice, policy, and future research.                                                                                                                                                             | Discussion                                               |
| <b>OTHER INFORMATION</b>                       |        |                                                                                                                                                                                                                                            |                                                          |
| Registration and protocol                      | 24a    | Provide registration information for the review, including register name and registration number, or state that the review was not registered.                                                                                             | Abstract and Methods.                                    |
|                                                | 24b    | Indicate where the review protocol can be accessed, or state that a protocol was not prepared.                                                                                                                                             | Methods                                                  |
|                                                | 24c    | Describe and explain any amendments to information provided at registration or in the protocol.                                                                                                                                            | No amendments were made to the protocol.                 |
| Support                                        | 25     | Describe sources of financial or non-financial support for the review, and the role of the funders or sponsors in the review.                                                                                                              | Funding statement section.                               |
| Competing interests                            | 26     | Declare any competing interests of review authors.                                                                                                                                                                                         | Competing interests section.                             |
| Availability of data, code and other materials | 27     | Report which of the following are publicly available and where they can be found: template data collection forms; data extracted from included studies; data used for all analyses; analytic code; any other materials used in the review. | Main manuscript, Supplementary Material, and Appendix A. |

From: Page MJ, McKenzie JE, Bossuyt PM, Boutron I, Hoffmann TC, Mulrow CD, et al. The PRISMA 2020 statement: an updated guideline for reporting systematic reviews. BMJ 2021;372:n71. doi: 10.1136/bmj.n71  
For more information, visit: <http://www.prisma-statement.org/>

**Table S2. Search strategies from the PubMed, Scopus, and Web of Science databases.**

**PubMed search strategy:**

((((respiratory syncytial virus or RSV) AND epidemiology) or ((respiratory syncytial virus or RSV) and seasonality) or ((respiratory syncytial virus or RSV) and hospitalization)) NOT (resveratrol OR Rous sarcoma virus OR bovine OR mice OR ferret OR macrophages OR in vitro OR nosocomial OR mathematical) Filters: from 2015/1/1 - 2022/12/31

**Scopus search strategy:**

(( (TITLE-ABS ( ( ( "respiratory syncytial virus" OR "RSV" ) AND "epidemiology" ) ) ) OR (TITLE-ABS ( ( ( "respiratory syncytial virus" OR "RSV" ) AND "seasonality" ) ) ) OR ( (TITLE-ABS ( "respiratory syncytial virus" OR "RSV" ) ) AND ( TITLE-ABS ( "hospitalization" ) ) ) ) AND NOT ( ALL ( ( "resveratrol" OR "Rous sarcoma virus" OR "bovine" OR "mice" OR "ferret" OR "macrophages" OR "in vitro" OR "nosocomial" OR "mathematical" ) ) ) ) AND (PUBYEAR > 2014 AND PUBYEAR < 2023)

**Web of Science search strategy:**

1: ALL=(((respiratory syncytial virus or RSV) AND epidemiology))

2: ALL=(((respiratory syncytial virus or RSV) and seasonality))

3: ALL=((respiratory syncytial virus or RSV) and hospitalization)

4: ALL=((resveratrol OR Rous sarcoma virus OR bovine OR mice OR ferret OR macrophages OR in vitro OR nosocomial OR mathematical))

5: ((#1) OR #2) OR #3 Timespan: 2015-01-01 to 2022-12-31

6: (#5) NOT #4 Timespan: 2015-01-01 to 2022-12-31

**Table S3. Risk of bias tool by Hoy et al.**

| <b>The Hoy et al. tool for assessing bias in prevalence studies.</b>                                                      | <b>Yes (1)/No (0)</b> |
|---------------------------------------------------------------------------------------------------------------------------|-----------------------|
| <b>Domains of external validity</b>                                                                                       |                       |
| 1. Was the study's target population a close representation of the national population in relation to relevant variables? |                       |
| 2. Was the sampling frame a true or close representation of the target population?                                        |                       |
| 3. Was some form of random selection used to select the sample, OR was a census undertaken?                               |                       |
| 4. Was the likelihood of nonresponse bias minimal?                                                                        |                       |
| <b>Domains of internal validity</b>                                                                                       |                       |
| 5. Were data collected directly from the subjects (as opposed to a proxy)?                                                |                       |
| 6. Was an acceptable case definition used in the study?                                                                   |                       |
| 7. Was the study instrument that measured the parameter of interest shown to have validity and reliability?               |                       |
| 8. Was the same mode of data collection used for all subjects?                                                            |                       |
| 9. Was the length of the shortest prevalence period for the parameter of interest appropriate?                            |                       |
| 10. Were the numerator(s) and denominator(s) for the parameter of interest appropriate?                                   |                       |

**Comment:** In this review, we identified the target population as children who were hospitalized due to lower respiratory tract infection (LRTI). Furthermore, we utilized the term "LRTI" as the case definition.

#### **Interpretation of the risk of bias tool**

- 7-10: Low risk of bias
- 4-6: Moderate risk of bias
- 0-3: High risk of bias.

#### **Reference:**

Hoy D, Brooks P, Woolf A, et al. Assessing risk of bias in prevalence studies: modification of an existing tool and evidence of interrater agreement. *J Clin Epidemiol.* 2012;65(9):934-939. doi:10.1016/j.jclinepi.2011.11.014

**Table S4. Risk of bias assessment.**

| <b>Author</b>                   | <b>D1</b> | <b>D2</b> | <b>D3</b> | <b>D4</b> | <b>D5</b> | <b>D6</b> | <b>D7</b> | <b>D8</b> | <b>D9</b> | <b>D10</b> | <b>Score</b> | <b>Risk of bias</b> |
|---------------------------------|-----------|-----------|-----------|-----------|-----------|-----------|-----------|-----------|-----------|------------|--------------|---------------------|
| Agca et al. [1]                 | 0         | 0         | 0         | 1         | 1         | 0         | 1         | 1         | 1         | 1          | 6            | Moderate risk       |
| Akkoc et al. [2]                | 0         | 1         | 0         | 1         | 1         | 1         | 1         | 1         | 1         | 1          | 8            | Low risk            |
| Al-Zayadneh et al. [3]          | 1         | 1         | 0         | 1         | 1         | 1         | 1         | 1         | 1         | 1          | 9            | Low risk            |
| Assane et al. [4]               | 0         | 0         | 0         | 0         | 1         | 0         | 1         | 1         | 1         | 1          | 5            | Moderate risk       |
| Baldassarre et al. [5]          | 1         | 1         | 0         | 1         | 1         | 1         | 1         | 1         | 1         | 1          | 9            | Low risk            |
| Barbati et al. [6]              | 0         | 0         | 0         | 0         | 1         | 0         | 1         | 1         | 1         | 1          | 5            | Moderate risk       |
| Bedir Demirdağ et al. [7]       | 0         | 0         | 0         | 0         | 1         | 0         | 1         | 1         | 1         | 1          | 5            | Moderate risk       |
| Ben-Shimol et al. [8]           | 0         | 1         | 0         | 1         | 1         | 1         | 1         | 1         | 1         | 1          | 8            | Low risk            |
| Berdah et al. [9]               | 1         | 1         | 0         | 1         | 1         | 1         | 1         | 1         | 1         | 1          | 9            | Low risk            |
| Bermúdez Barrezueta et al. [10] | 1         | 1         | 0         | 1         | 1         | 1         | 1         | 1         | 1         | 1          | 9            | Low risk            |
| Bhardwaj et al. [11]            | 0         | 0         | 0         | 1         | 1         | 0         | 1         | 1         | 1         | 1          | 6            | Moderate risk       |
| Brisca et al. [12]              | 1         | 1         | 0         | 1         | 1         | 1         | 1         | 1         | 1         | 1          | 9            | Low risk            |
| Buendía et al. [13]             | 1         | 1         | 0         | 1         | 1         | 1         | 1         | 1         | 1         | 1          | 9            | Low risk            |
| Buendía et al. [14]             | 1         | 1         | 0         | 1         | 1         | 1         | 1         | 1         | 1         | 1          | 9            | Low risk            |
| Camporesi et al. [15]           | 1         | 1         | 0         | 1         | 1         | 1         | 1         | 1         | 1         | 1          | 9            | Low risk            |
| Camporesi et al. [16]           | 0         | 1         | 0         | 1         | 1         | 1         | 1         | 1         | 1         | 1          | 8            | Low risk            |
| Cao et al. [17]                 | 0         | 1         | 1         | 1         | 1         | 1         | 1         | 1         | 1         | 1          | 9            | Low risk            |
| Carlone et al. [18]             | 0         | 0         | 0         | 1         | 1         | 0         | 1         | 0         | 1         | 1          | 5            | Low risk            |
| Chandy et al. [19]              | 1         | 1         | 0         | 1         | 1         | 1         | 1         | 1         | 1         | 1          | 9            | Low risk            |
| Chu et al. [20]                 | 1         | 1         | 0         | 1         | 1         | 1         | 1         | 1         | 1         | 1          | 9            | Low risk            |
| Coma et al. [21]                | 1         | 1         | 0         | 1         | 1         | 1         | 1         | 0         | 1         | 1          | 8            | Low risk            |
| Curatola et al. [22]            | 0         | 0         | 0         | 1         | 1         | 0         | 1         | 1         | 0         | 1          | 5            | Moderate risk       |
| Curatola et al. [23]            | 0         | 0         | 0         | 1         | 1         | 0         | 1         | 1         | 1         | 1          | 6            | Moderate risk       |
| De Rose et al. [24]             | 0         | 1         | 0         | 1         | 1         | 1         | 1         | 1         | 1         | 1          | 8            | Low risk            |
| Diesner-Treiber et al. [25]     | 1         | 1         | 0         | 1         | 1         | 1         | 1         | 1         | 1         | 1          | 9            | Low risk            |
| Esen et al. [26]                | 1         | 1         | 0         | 1         | 1         | 1         | 1         | 1         | 1         | 1          | 9            | Low risk            |

|                                |   |   |   |   |   |   |   |   |   |   |   |               |
|--------------------------------|---|---|---|---|---|---|---|---|---|---|---|---------------|
| Faraguna et al. [27]           | 0 | 1 | 0 | 1 | 1 | 1 | 1 | 1 | 1 | 1 | 8 | Low risk      |
| Feng et al. [28]               | 0 | 1 | 0 | 1 | 1 | 1 | 1 | 1 | 1 | 1 | 8 | Low risk      |
| Foley et al. [29]              | 1 | 1 | 0 | 1 | 1 | 1 | 1 | 1 | 1 | 1 | 9 | Low risk      |
| Giamberardino et al. [30]      | 0 | 0 | 0 | 0 | 1 | 0 | 1 | 1 | 1 | 1 | 5 | Moderate risk |
| Gonapaladeniya et al. [31]     | 1 | 1 | 0 | 1 | 1 | 1 | 1 | 1 | 1 | 1 | 9 | Low risk      |
| Grochowska et al. [32]         | 1 | 1 | 0 | 1 | 1 | 1 | 1 | 0 | 1 | 1 | 8 | Low risk      |
| Guerrero-Del-Cueto et al. [33] | 1 | 1 | 0 | 1 | 1 | 1 | 1 | 0 | 1 | 1 | 8 | Low risk      |
| Guitart et al. [34]            | 1 | 1 | 0 | 1 | 1 | 1 | 1 | 1 | 1 | 1 | 9 | Low risk      |
| Haddadin et al. [35]           | 0 | 1 | 0 | 1 | 1 | 1 | 1 | 1 | 1 | 1 | 8 | Low risk      |
| Havdal et al. [36]             | 1 | 1 | 0 | 1 | 1 | 1 | 1 | 1 | 1 | 1 | 9 | Low risk      |
| Hu et al. [37]                 | 1 | 1 | 0 | 1 | 1 | 0 | 1 | 1 | 1 | 1 | 8 | Low risk      |
| Ippolito et al. [38]           | 0 | 0 | 0 | 1 | 1 | 0 | 1 | 1 | 1 | 1 | 6 | Moderate risk |
| Jiang et al. [39]              | 1 | 1 | 0 | 1 | 1 | 1 | 1 | 1 | 1 | 1 | 9 | Low risk      |
| Jiang et al. [40]              | 1 | 1 | 0 | 1 | 1 | 1 | 1 | 1 | 1 | 1 | 9 | Low risk      |
| Jiang et al. [41]              | 0 | 1 | 0 | 1 | 1 | 1 | 1 | 1 | 1 | 1 | 8 | Low risk      |
| Jullien et al. [42]            | 1 | 1 | 0 | 1 | 1 | 1 | 1 | 1 | 1 | 1 | 9 | Low risk      |
| Kang et al. [43]               | 0 | 0 | 0 | 1 | 1 | 0 | 1 | 1 | 1 | 1 | 6 | Moderate risk |
| Kıymet et al. [44]             | 0 | 0 | 0 | 1 | 1 | 0 | 1 | 1 | 1 | 1 | 6 | Moderate risk |
| Knudsen et al. [45]            | 1 | 1 | 0 | 1 | 1 | 1 | 1 | 1 | 1 | 1 | 9 | Low risk      |
| Kockuzu et al. [46]            | 0 | 0 | 0 | 1 | 1 | 0 | 1 | 1 | 1 | 1 | 6 | Moderate risk |
| Komoyo et al. [47]             | 0 | 0 | 0 | 1 | 1 | 0 | 1 | 1 | 1 | 1 | 6 | Moderate risk |
| Korsun et al. [48]             | 0 | 0 | 0 | 1 | 1 | 0 | 1 | 1 | 1 | 1 | 6 | Moderate risk |
| Kume et al. [49]               | 0 | 0 | 0 | 1 | 1 | 0 | 1 | 1 | 1 | 1 | 6 | Moderate risk |
| Kurskaya et al. [50]           | 0 | 1 | 0 | 1 | 1 | 1 | 1 | 1 | 1 | 1 | 8 | Low risk      |
| Lagare et al. [51]             | 1 | 1 | 0 | 1 | 1 | 1 | 1 | 1 | 1 | 1 | 9 | Low risk      |
| Lamrani Hanchi et al. [52]     | 1 | 1 | 0 | 0 | 1 | 1 | 1 | 1 | 1 | 1 | 8 | Low risk      |
| Li et al. [53]                 | 0 | 1 | 0 | 1 | 1 | 1 | 1 | 1 | 1 | 1 | 8 | Low risk      |
| Li et al. [54]                 | 0 | 1 | 0 | 1 | 1 | 1 | 1 | 1 | 1 | 1 | 8 | Low risk      |
| Li et al. [55]                 | 1 | 1 | 0 | 1 | 1 | 1 | 1 | 1 | 1 | 1 | 9 | Low risk      |



|                           |   |   |   |   |   |   |   |   |   |   |    |               |
|---------------------------|---|---|---|---|---|---|---|---|---|---|----|---------------|
| Li et al. [56]            | 0 | 0 | 0 | 1 | 1 | 0 | 1 | 1 | 1 | 1 | 6  | Moderate risk |
| Liu et al. [57]           | 1 | 1 | 0 | 1 | 1 | 1 | 1 | 1 | 1 | 1 | 9  | Low risk      |
| Liu et al. [58]           | 1 | 1 | 0 | 1 | 1 | 1 | 1 | 1 | 1 | 1 | 9  | Low risk      |
| Lucion et al. [59]        | 0 | 1 | 0 | 1 | 1 | 1 | 1 | 0 | 1 | 1 | 7  | Low risk      |
| Ma et al. [60]            | 1 | 1 | 0 | 1 | 1 | 1 | 1 | 1 | 1 | 1 | 9  | Low risk      |
| Mackenzie et al. [61]     | 1 | 1 | 0 | 1 | 1 | 1 | 1 | 1 | 1 | 1 | 9  | Low risk      |
| Maglione et al. [62]      | 0 | 0 | 0 | 1 | 1 | 0 | 1 | 0 | 0 | 1 | 4  | Moderate risk |
| Maruo et al. [63]         | 0 | 0 | 0 | 1 | 1 | 0 | 1 | 1 | 1 | 1 | 6  | Moderate risk |
| Mira-Iglesias et al. [64] | 1 | 1 | 0 | 1 | 1 | 1 | 1 | 1 | 1 | 1 | 9  | Low risk      |
| Moreira et al. [65]       | 0 | 1 | 0 | 1 | 1 | 0 | 1 | 1 | 1 | 1 | 7  | Low risk      |
| Nenna et al. [66]         | 0 | 0 | 0 | 1 | 1 | 0 | 1 | 1 | 1 | 1 | 6  | Moderate risk |
| Nenna et al. [67]         | 1 | 1 | 0 | 1 | 1 | 1 | 1 | 1 | 1 | 1 | 9  | Low risk      |
| Ng et al. [68]            | 0 | 1 | 0 | 1 | 1 | 1 | 1 | 1 | 1 | 1 | 8  | Low risk      |
| Núñez-Samudio et al. [69] | 0 | 1 | 0 | 1 | 1 | 1 | 1 | 1 | 1 | 1 | 8  | Low risk      |
| Nunziata et al. [70]      | 1 | 1 | 0 | 1 | 1 | 1 | 1 | 1 | 1 | 1 | 9  | Low risk      |
| Oumei et al. [71]         | 1 | 1 | 0 | 1 | 1 | 1 | 1 | 1 | 1 | 1 | 9  | Low risk      |
| Pale et al. [72]          | 1 | 1 | 0 | 1 | 1 | 1 | 1 | 1 | 1 | 1 | 9  | Low risk      |
| Pierangeli et al. [73]    | 0 | 0 | 0 | 1 | 1 | 0 | 1 | 1 | 1 | 1 | 6  | Moderate risk |
| Pogonowska et al. [74]    | 0 | 0 | 0 | 1 | 1 | 0 | 1 | 1 | 1 | 1 | 6  | Moderate risk |
| Prasad et al. [75]        | 1 | 1 | 1 | 1 | 1 | 1 | 1 | 1 | 1 | 1 | 10 | Low risk      |
| Prasad et al. [76]        | 1 | 1 | 0 | 1 | 1 | 1 | 1 | 1 | 1 | 1 | 9  | Low risk      |
| Presti et al. [77]        | 0 | 0 | 0 | 1 | 1 | 0 | 1 | 1 | 1 | 1 | 6  | Moderate risk |
| Pruccoli et al. [78]      | 1 | 0 | 0 | 1 | 1 | 0 | 1 | 0 | 1 | 1 | 6  | Moderate risk |
| Qiu et al. [79]           | 1 | 1 | 0 | 1 | 1 | 1 | 1 | 1 | 1 | 1 | 9  | Low risk      |
| Ramezannia et al. [80]    | 0 | 0 | 0 | 1 | 1 | 0 | 1 | 1 | 1 | 1 | 6  | Moderate risk |
| Rha et al. [81]           | 1 | 1 | 0 | 1 | 1 | 1 | 1 | 1 | 1 | 1 | 9  | Low risk      |
| Roland et al. [82]        | 0 | 0 | 0 | 1 | 1 | 0 | 1 | 1 | 1 | 1 | 6  | Moderate risk |
| Sachs et al. [83]         | 0 | 1 | 0 | 1 | 1 | 1 | 1 | 1 | 1 | 1 | 8  | Low risk      |
| Sarkar et al. [84]        | 0 | 1 | 0 | 1 | 1 | 1 | 1 | 1 | 1 | 1 | 8  | Low risk      |

|                          |   |   |   |   |   |   |   |   |   |   |   |               |
|--------------------------|---|---|---|---|---|---|---|---|---|---|---|---------------|
| Savaş Şen et al. [85]    | 1 | 1 | 0 | 1 | 1 | 1 | 1 | 1 | 1 | 1 | 9 | Low risk      |
| Shen et al. [86]         | 0 | 1 | 0 | 1 | 1 | 1 | 1 | 1 | 1 | 1 | 8 | Low risk      |
| Shen et al. [87]         | 0 | 0 | 0 | 1 | 1 | 0 | 1 | 1 | 1 | 1 | 6 | Moderate risk |
| Shi et al. [88]          | 0 | 0 | 0 | 1 | 1 | 0 | 1 | 1 | 1 | 1 | 6 | Moderate risk |
| Singh et al. [89]        | 0 | 0 | 0 | 1 | 1 | 0 | 1 | 1 | 1 | 1 | 6 | Moderate risk |
| Sobrinho et al. [90]     | 1 | 1 | 0 | 1 | 1 | 1 | 1 | 0 | 1 | 1 | 8 | Low risk      |
| Song et al. [91]         | 0 | 0 | 0 | 1 | 1 | 0 | 1 | 1 | 1 | 1 | 6 | Moderate risk |
| Stera et al. [92]        | 1 | 1 | 0 | 1 | 1 | 1 | 1 | 1 | 1 | 1 | 9 | Low risk      |
| Tang et al. [93]         | 0 | 0 | 0 | 0 | 1 | 0 | 1 | 1 | 1 | 1 | 5 | Moderate risk |
| Thongpan et al. [94]     | 0 | 0 | 0 | 1 | 1 | 0 | 1 | 1 | 1 | 1 | 6 | Moderate risk |
| Thwaites et al. [95]     | 1 | 1 | 0 | 1 | 1 | 1 | 1 | 1 | 1 | 1 | 9 | Low risk      |
| Trenholme et al. [96]    | 1 | 1 | 0 | 1 | 1 | 1 | 1 | 1 | 1 | 1 | 9 | Low risk      |
| Tsergouli et al. [97]    | 0 | 0 | 0 | 1 | 1 | 0 | 1 | 1 | 1 | 1 | 6 | Moderate risk |
| Valley-Omar et al. [98]  | 0 | 0 | 0 | 1 | 1 | 0 | 1 | 1 | 1 | 1 | 6 | Moderate risk |
| Varela et al. [99]       | 0 | 0 | 0 | 0 | 1 | 0 | 1 | 1 | 1 | 1 | 5 | Moderate risk |
| Virant et al. [100]      | 1 | 1 | 0 | 1 | 1 | 0 | 1 | 1 | 1 | 1 | 8 | Low risk      |
| Vittucci et al. [101]    | 0 | 0 | 0 | 1 | 1 | 0 | 1 | 1 | 1 | 1 | 6 | Moderate risk |
| Wang et al. [102]        | 0 | 0 | 0 | 1 | 1 | 0 | 1 | 1 | 1 | 1 | 6 | Moderate risk |
| Watanabe et al. [103]    | 0 | 0 | 0 | 1 | 1 | 0 | 1 | 1 | 1 | 1 | 6 | Moderate risk |
| Weldetsadik et al. [104] | 0 | 1 | 0 | 1 | 1 | 1 | 1 | 1 | 1 | 1 | 8 | Low risk      |
| Wen et al. [105]         | 0 | 0 | 0 | 1 | 1 | 0 | 1 | 1 | 1 | 1 | 6 | Moderate risk |
| Windsor et al. [106]     | 0 | 0 | 1 | 0 | 1 | 0 | 1 | 1 | 1 | 1 | 6 | Moderate risk |
| Xia et al. [107]         | 1 | 1 | 0 | 1 | 1 | 1 | 1 | 1 | 1 | 1 | 9 | Low risk      |
| Xu et al. [108]          | 1 | 1 | 0 | 1 | 1 | 1 | 1 | 1 | 1 | 1 | 9 | Low risk      |
| Yan et al. [109]         | 0 | 1 | 0 | 1 | 1 | 1 | 1 | 1 | 1 | 1 | 8 | Low risk      |
| Ye et al. [110]          | 1 | 1 | 0 | 1 | 1 | 1 | 1 | 1 | 1 | 1 | 9 | Low risk      |
| Zhao et al. [111]        | 0 | 0 | 0 | 1 | 1 | 0 | 1 | 1 | 1 | 1 | 6 | Moderate risk |
| Zhao et al. [112]        | 0 | 0 | 0 | 1 | 1 | 0 | 1 | 1 | 1 | 1 | 6 | Moderate risk |

Abbreviations: D, Domain.

**Table S5. Countries of the studies included in this systematic review and meta-analysis.**

| <b>Country</b>           | <b>N=112</b> | <b>Percent (%)</b> |
|--------------------------|--------------|--------------------|
| Argentina                | 1            | 0.9                |
| Australia                | 1            | 0.9                |
| Austria                  | 1            | 0.9                |
| Belgium                  | 1            | 0.9                |
| Bhutan                   | 1            | 0.9                |
| Brazil                   | 5            | 4.5                |
| Bulgaria                 | 1            | 0.9                |
| Central African Republic | 1            | 0.9                |
| China                    | 27           | 24.1               |
| Colombia                 | 2            | 1.8                |
| Ethiopia                 | 1            | 0.9                |
| France                   | 1            | 0.9                |
| Gambia                   | 1            | 0.9                |
| Greece                   | 1            | 0.9                |
| India                    | 5            | 4.5                |
| Iran                     | 1            | 0.9                |
| Israel                   | 2            | 1.8                |
| Italy                    | 20           | 17.9               |
| Japan                    | 2            | 1.8                |
| Jordan                   | 1            | 0.9                |
| Malaysia                 | 1            | 0.9                |
| Morocco                  | 1            | 0.9                |
| Mozambique               | 1            | 0.9                |
| New Zealand              | 3            | 2.7                |
| Niger                    | 1            | 0.9                |
| Norway                   | 2            | 1.8                |
| Panama                   | 1            | 0.9                |
| Poland                   | 2            | 1.8                |
| Russia                   | 1            | 0.9                |
| Senegal                  | 1            | 0.9                |
| Slovenia                 | 1            | 0.9                |
| South Africa             | 1            | 0.9                |
| Spain                    | 5            | 4.5                |
| Sri Lanka                | 1            | 0.9                |

|                          |     |     |
|--------------------------|-----|-----|
| Thailand                 | 1   | 0.9 |
| Turkey                   | 7   | 6.3 |
| United Kingdom           | 2   | 1.8 |
| United States of America | 4   | 3.6 |
| <b>Total</b>             | 112 | 100 |

---

**Table S6. Characteristics of all included studies.**

| Study                                | Period                               | Design          | Sampling    | Timing        | Country  | WHO-Region            | Sample type                      | Diagnostic technique\$    | Age                   | Male (%) |
|--------------------------------------|--------------------------------------|-----------------|-------------|---------------|----------|-----------------------|----------------------------------|---------------------------|-----------------------|----------|
| Agca et al. [1] 2021                 | March 2020 to February 2021.         | Cross-sectional | Consecutive | Retrospective | Turkey   | European              | Nasopharyngeal secretions        | Multiplex RT-PCR          | < 18 years            | 62.4%    |
| Akkoc et al. [2] 2022                | January 2019 to February 2020        | Cross-sectional | Consecutive | Retrospective | Turkey   | European              | Nasopharyngeal secretions        | Multiplex RT-PCR          | 1 month to 5 years    | 73.8%    |
| Al-Zayadneh et al. [3] 2021          | December 2018 to April 2019          | Longitudinal    | Consecutive | Prospective   | Jordan   | Eastern Mediterranean | Nasopharyngeal secretions        | Multiplex RT-PCR          | 1 month to 15 years   | 62.5%    |
| Assane et al. [4] 2018               | January 2015 to January 2016         | Cross-sectional | Consecutive | Prospective   | Senegal  | African               | Nasopharyngeal secretions        | Multiplex RT-PCR          | < 5 years             | 59.9%    |
| Baldassarre et al. [5] 2023          | 1 January to 31 December 2021.       | Cross-sectional | Consecutive | Retrospective | Italy    | European              | Not reported                     | RT-PCR                    | 0–12 months           | 55.30%   |
| Barbati et al. [6] 2020              | September 2014 to August 2019        | Cross-sectional | Consecutive | Retrospective | Italy    | European              | Nasopharyngeal secretions or BLF | RT-qPCR                   | < 6 years             | 55.4%    |
| Bedir Demirdağ et al. [7] 2022       | October 1, 2021 to January 1, 2022   | Cross-sectional | Consecutive | Retrospective | Turkey   | European              | Nasopharyngeal secretions        | Multiplex PCR             | 18 days to 17.9 years | 64.3%    |
| Ben-Shimol et al. [8] 2023           | January 2019 to March 2020           | Longitudinal    | Consecutive | Prospective   | Israel   | European              | Nasopharyngeal secretions        | RT-PCR                    | 2–17 months           | 68.40%   |
| Berdah et al. [9] 2022               | October 1, 2017 to March 31, 2021.   | Cross-sectional | Consecutive | Retrospective | France   | European              | Nasopharyngeal secretions        | PCR                       | < 1 year              | 58.0%    |
| Bermúdez Barrezueta et al. [10] 2022 | March 15, 2020, to August 31, 2021   | Cross-sectional | Consecutive | Ambispective  | Spain    | European              | Nasopharyngeal secretions        | Direct immunofluorescence | < 2 years             | 58.3%    |
| Bhardwaj et al. [11] 2022            | January 2017 to December 2021        | Cross-sectional | Consecutive | Retrospective | India    | South-East Asia       | Throat swab                      | RT-PCR                    | < 15 years            | 61.7%    |
| Brisca et al. [12] 2023              | September 1, 2017, to June 30, 2022. | Cross-sectional | Consecutive | Retrospective | Italy    | European              | Nasopharyngeal secretions        | Multiplex PCR             | 0–2 years             | 50.20%   |
| Buendia et al. [13] 2021             | January 2019 to December 2019.       | Longitudinal    | Consecutive | Retrospective | Colombia | Americas              | Nasopharyngeal secretions        | Direct immunofluorescence | < 2 years             | 60.3%    |
| Buendía et al. [14] 2021             | January 2015 to December 2016        | Cross-sectional | Consecutive | Retrospective | Colombia | Americas              | Not reported                     | Direct immunofluorescence | < 2 years             | 58.55%   |
| Camporesi et al. [15] 2023           | 1 July 2021 to March 2023.           | Longitudinal    | Consecutive | Prospective   | Italy    | European              | Nasal secretions                 | RT-PCR                    | < 2 years             | 56.90%   |
| Camporesi et al. [16] 2022           | July 1, 2021 to January 31, 2022.    | Longitudinal    | Consecutive | Prospective   | Italy    | European              | Nasopharyngeal secretions        | PCR                       | < 2 years             | 53.09%   |

|                                     |                                       |                 |             |               |           |                 |                           |                  |                       |              |
|-------------------------------------|---------------------------------------|-----------------|-------------|---------------|-----------|-----------------|---------------------------|------------------|-----------------------|--------------|
| Cao et al. [17] 2023                | January 2015 to December 2021.        | Cross-sectional | Consecutive | Retrospective | China     | Western Pacific | Oropharyngeal secretions  | RT-PCR           | < 18 years            | 62.50%       |
| Carlone et al. [18] 2023            | October 2021 and February 2022        | Longitudinal    | Consecutive | Retrospective | Italy     | European        | Nasal secretions          | PCR              | < 2 years             | 56.80%       |
| Chandy et al. [19] 2022             | September 2019 to February 2020       | Cross-sectional | Consecutive | Prospective   | India     | South-East Asia | Nasopharyngeal secretions | Multiplex RT-PCR | < 5 years             | 66.4%        |
| Chu et al. [20] 2022                | January 2016 to December 2019         | Cross-sectional | Consecutive | Retrospective | China     | Western Pacific | Nasopharyngeal secretions | PCR              | < 14 years            | 63.42%       |
| Coma et al. [21] 2022               | September 1, 2009 to July 11, 2021    | Longitudinal    | Consecutive | Retrospective | Spain     | European        | Not reported              | Mixed¥           | < 5 years             | 56.0%        |
| Curatola et al. [22] 2023           | September 2021 and March 2022         | Cross-sectional | Consecutive | Retrospective | Italy     | European        | Nasopharyngeal secretions | RT-PCR           | 0 to 2 years          | 53.10%       |
| Curatola et al. [23] 2021           | February 2020 to February 2021        | Cross-sectional | Consecutive | Retrospective | Italy     | European        | Nasopharyngeal secretions | PCR              | < 2 years             | 72.7%        |
| De Rose et al. [24] 2022            | January 1, 2018 to February 28, 2022  | Cross-sectional | Consecutive | Retrospective | Italy     | European        | Nasopharyngeal secretions | Multiplex RT-PCR | < 3 months            | Not reported |
| Diesner-Treiber et al. [25] 2021    | November 2020 to April 2021           | Longitudinal    | Consecutive | Prospective   | Austria   | European        | Nasal secretions          | Multiplex PCR    | 0 to 24 months        | 59.0%        |
| Esen et al. [26] 2019               | November 2015 and April 2016          | Cross-sectional | Consecutive | Prospective   | Turkey    | European        | Nasopharyngeal secretions | RT-PCR           | < 2 years             | 52.67%       |
| Faraguna et al. [27] 2023           | September and April of 2017–2022      | Longitudinal    | Consecutive | Retrospective | Italy     | European        | Nasopharyngeal secretions | RT-PCR           | < 1 year              | Not reported |
| Feng et al. [28] 2023               | November 1, 2018, to April 30, 2019   | Cross-sectional | Consecutive | Prospective   | China     | Western Pacific | Nasopharyngeal secretions | Multiplex RT-PCR | 1 month and 18 years  | 59.50%       |
| Foley et al. [29] 2022              | January 1, 2019 to December 31, 2020. | Longitudinal    | Consecutive | Prospective   | Australia | Western Pacific | Nasopharyngeal secretions | PCR              | < 16 years            | 51.0%        |
| Giamberardino et al. [30] 2022      | March 2017 to September 2018.         | Longitudinal    | Consecutive | Prospective   | Brazil    | Americas        | Nasopharyngeal secretions | Multiplex RT-PCR | < 2 years             | 52.9%        |
| Gonapaladeniya et al. [31] 2021     | June 2018 to April 2019               | Cross-sectional | Consecutive | Prospective   | Sri Lanka | South-East Asia | Nasopharyngeal secretions | Multiplex RT-PCR | 3 months to < 5 years | 39.1%        |
| Grochowska et al. [32] 2022         | April 1, 2016 to March 31, 2021.      | Cross-sectional | Consecutive | Retrospective | Poland    | European        | Nasopharyngeal secretions | Mixed¥           |                       | Not reported |
| Guerrero-Del-Cueto et al. [33] 2023 | April 2020 to December 2021.          | Longitudinal    | Consecutive | Ambispective  | Spain     | European        | Not reported              | Multiplex PCR    | < 2 years             | 51.50%       |

|                           |                                       |                 |             |               |                          |                 |                                  |                           |                       |              |
|---------------------------|---------------------------------------|-----------------|-------------|---------------|--------------------------|-----------------|----------------------------------|---------------------------|-----------------------|--------------|
| Guitart et al. [34] 2022  | September 2010 to June 2021           | Cross-sectional | Consecutive | Prospective   | Spain                    | European        | Nasopharyngeal secretions or BLF | Multiplex PCR             |                       | 50.8%        |
| Haddadin et al. [35] 2021 | December 16, 2019 to April 30, 2020   | Longitudinal    | Consecutive | Prospective   | United States of America | Americas        | Nasal secretions                 | PCR                       | < 1 year              | 53.0%        |
| Havdal et al. [36] 2022   | 2015 to 2018                          | Cross-sectional | Consecutive | Prospective   | Norway                   | European        | Nasopharyngeal secretions        | PCR                       | < 5 years             | 41.3%        |
| Hu et al. [37] 2023       | January 2014 to June 2022             | Longitudinal    | Consecutive | Retrospective | China                    | Western Pacific | Nasopharyngeal secretions        | Direct immunofluorescence | < 18 years            | 59.84%       |
| Ippolito et al. [38] 2021 | 2018-2021                             | Cross-sectional | Consecutive | Retrospective | Italy                    | European        | Nasopharyngeal secretions        | Multiplex PCR             | < 2 years             | 69.0%        |
| Jiang et al. [39] 2023    | July 1, 2017 to December 31, 2021     | Cross-sectional | Consecutive | Prospective   | China                    | Western Pacific | Mixed*                           | Multiplex PCR             | < 5 years             | 58.53%       |
| Jiang et al. [40] 2017    | January 2015 to December 2015         | Cross-sectional | Consecutive | Prospective   | China                    | Western Pacific | Nasopharyngeal secretions        | Direct immunofluorescence | 1 month to 14 years   | 57.8%        |
| Jiang et al. [41] 2022    | February 1, 2019 to January 31, 2021. | Cross-sectional | Consecutive | Retrospective | China                    | Western Pacific | Nasopharyngeal secretions        | Direct immunofluorescence | 1 month to 1 year old | 68.2%        |
| Jullien et al. [42] 2020  | July 1, 2017 to June 30, 2018         | Longitudinal    | Consecutive | Prospective   | Bhutan                   | South-East Asia | Nasopharyngeal secretions        | Multiplex RT-PCR          | < 5 years             | 57.7%        |
| Kang et al. [43] 2023     | October 2019 to July 2022.            | Longitudinal    | Consecutive | Prospective   | India                    | South-East Asia | Mixed*                           | Multiplex PCR             | 1 month to 12 years   | Not reported |
| Kıymet et al. [44] 2021   | March 11, 2020 to March 11, 2021.     | Cross-sectional | Consecutive | Prospective   | Turkey                   | European        | Nasopharyngeal secretions        | Multiplex RT-PCR          | ≤ 18 years            | 57.5%        |
| Knudsen et al. [45] 2022  | 2017-2021                             | Cross-sectional | Consecutive | Ambispective  | Norway                   | European        | Nasopharyngeal secretions        | PCR                       | 0-18 years            | 57.5%        |
| Kockuzu et al. [46] 2019  | October 2016 to February 2017         | Cross-sectional | Consecutive | Retrospective | Turkey                   | European        | Nasal secretions                 | PCR                       | 1 month to 18 years   | 63.0%        |
| Komoyo et al. [47] 2021   | 2015 to 2018                          | Cross-sectional | Consecutive | Prospective   | Central African Republic | African         | Nasopharyngeal secretions        | Multiplex RT-PCR          | < 5 years             | 51.9%        |
| Korsun et al. [48] 2021   | October 2016 to September 2018        | Cross-sectional | Consecutive | Prospective   | Bulgaria                 | European        | Nasopharyngeal secretions        | RT-PCR                    | < 5 years             | 55.5%        |
| Kume et al. [49] 2022     | January 2018 to December 2021         | Cross-sectional | Consecutive | Prospective   | Japan                    | Western Pacific | Nasopharyngeal secretions        | RT-PCR                    | < 15 years            | 53.7%        |
| Kurskaya et al. [50] 2023 | 2019-2022                             | Longitudinal    | Consecutive | Prospective   | Russia                   | European        | Mixed*                           | RT-PCR                    | 0–17 years            | 55.0%        |

|                                 |                                                                         |                 |             |               |           |                       |                                  |                           |               |              |
|---------------------------------|-------------------------------------------------------------------------|-----------------|-------------|---------------|-----------|-----------------------|----------------------------------|---------------------------|---------------|--------------|
| Lagare et al. [51] 2019         | 2015-2016                                                               | Cross-sectional | Consecutive | Prospective   | Niger     | African               | Nasopharyngeal secretions        | RT-qPCR                   | < 5 years     | 56.4%        |
| Lamrani Hanchi et al. [52] 2022 | January 2018 to December 2021                                           | Cross-sectional | Consecutive | Retrospective | Morocco   | Eastern Mediterranean | Nasopharyngeal secretions or BLF | Multiplex PCR             | < 14 years    | 58.5%        |
| Li et al. [53] 2023             | January 2010 to December 2019                                           | Cross-sectional | Consecutive | Retrospective | China     | Western Pacific       | Oropharyngeal secretions         | RT-PCR                    | ≤14 years     | 67.94%       |
| Li et al. [54] 2023             | From 1 March 2021 through 28 February 2022.                             | Cross-sectional | Consecutive | Prospective   | China     | Western Pacific       | Oropharyngeal secretions         | Multiplex RT-PCR          | ≤5 years      | 69.8%        |
| Li et al. [55] 2020             | August 2018 to February 2019                                            | Cross-sectional | Consecutive | Prospective   | China     | Western Pacific       | Nasopharyngeal secretions        | RT-PCR                    | < 18 years    | 67.8%        |
| Li et al. [56] 2022             | September 1, 2010 to December 31, 2019.                                 | Cross-sectional | Consecutive | Retrospective | China     | Western Pacific       | Nasopharyngeal secretions or BLF | Direct immunofluorescence |               | Not reported |
| Liu et al. [57] 2018            | January 2013 to December 2015                                           | Longitudinal    | Consecutive | Prospective   | China     | Western Pacific       | Nasopharyngeal secretions or BLF | Direct immunofluorescence | < 18 years    | 62.1%        |
| Liu et al. [58] 2021            | 2019-2020                                                               | Cross-sectional | Consecutive | Prospective   | China     | Western Pacific       | Nasopharyngeal secretions or BLF | Direct immunofluorescence | < 18 years    | 60.0%        |
| Lucion et al. [59] 2022         | 2019 to 2020                                                            | Cross-sectional | Consecutive | Retrospective | Argentina | Americas              | Mixed*                           | Mixed¥                    | < 2 years     | 65.0%        |
| Ma et al. [60] 2022             | September 1, 2018 to December 31, 2020.                                 | Cross-sectional | Consecutive | Prospective   | China     | Western Pacific       | Throat swab                      | Antigen                   | < 12 years    | 56.7%        |
| Mackenzie et al. [61] 2019      | February 10 and December 31, 2015.                                      | Cross-sectional | Consecutive | Prospective   | Gambia    | African               | Oropharyngeal secretions         | RT-PCR                    | 2-23 months   | 54.5%        |
| Maglione et al. [62] 2022       | 1 July 2021 to 31 March 2022                                            | Longitudinal    | Consecutive | Retrospective | Italy     | European              | Nasopharyngeal secretions        | PCR                       | < 14 years    | 53.7%        |
| Maruo et al. [63] 2022          | 2017-2020                                                               | Cross-sectional | Consecutive | Retrospective | Japan     | Western Pacific       | Nasopharyngeal secretions        | Antigen                   | 0–14 years    | 59.2%        |
| Mira-Iglesias et al. [64] 2022  | 2014 to 2018.                                                           | Longitudinal    | Consecutive | Prospective   | Spain     | European              | Nasopharyngeal secretions        | Multiplex RT-PCR          | < 1 year      | Not reported |
| Moreira et al. [65] 2023        | August 2020 to September 2021                                           | Longitudinal    | Consecutive | Prospective   | Brazil    | Americas              | Nasopharyngeal secretions        | RT-PCR                    | 0 to 13 years | 53.90%       |
| Nenna et al. [66] 2022          | March 9, 2016 to February 28, 2017. March 9, 2020 to February 28, 2021. | Longitudinal    | Consecutive | Ambispective  | Italy     | European              | Nasal secretions                 | RT-PCR                    | 0-18 years    | Not reported |



|                                |                                        |                 |             |               |                          |                       |                                  |                           |                          |              |
|--------------------------------|----------------------------------------|-----------------|-------------|---------------|--------------------------|-----------------------|----------------------------------|---------------------------|--------------------------|--------------|
| Nenna et al. [67] 2022         | September 1, 2021 to 15 March 15, 2022 | Cross-sectional | Consecutive | Prospective   | Italy                    | European              | Nasopharyngeal secretions        | Multiplex RT-PCR          | < 12 years               | 52.6%        |
| Ng et al. [68] 2022            | April 1, 2021 to October 31, 2021.     | Cross-sectional | Consecutive | Retrospective | Malaysia                 | Western Pacific       | Nasopharyngeal secretions or BLF | Multiplex RT-PCR          | ≤ 12 years               | 59.5%        |
| Núñez-Samudio et al. [69] 2021 | 2016-2017                              | Cross-sectional | Consecutive | Retrospective | Panama                   | Americas              | Oropharyngeal secretions         | qPCR                      | 29 days to 14 years      | 44.7%        |
| Nunziata et al. [70] 2023      | November 2021 and April 2022           | Longitudinal    | Consecutive | Retrospective | Italy                    | European              | Nasal secretions                 | Multiplex PCR             | < 2 years                | Not reported |
| Oumei et al. [71] 2018         | January to December 2015               | Cross-sectional | Consecutive | Prospective   | China                    | Western Pacific       | Oropharyngeal secretions         | Direct immunofluorescence | 6 months to 14 years     | Not reported |
| Pale et al. [72] 2017          | January 2015 to January 2016           | Cross-sectional | Consecutive | Prospective   | Mozambique               | African               | Nasopharyngeal secretions        | RT-PCR                    | ≤ 2 years                | 51.5%        |
| Pierangeli et al. [73] 2022    | December 1, 2018 to April 30, 2019.    | Cross-sectional | Consecutive | Prospective   | Italy                    | European              | Mixed*                           | RT-PCR                    | < 3 years                | Not reported |
| Pogonowska et al. [74] 2022    | 2020-2021                              | Cross-sectional | Consecutive | Retrospective | Poland                   | European              | Nasopharyngeal secretions        | Antigen                   | < 2 years                | 48.0%        |
| Prasad et al. [75] 2019        | 2012-2015                              | Longitudinal    | Random      | Prospective   | New Zealand              | Western Pacific       | Nasopharyngeal secretions        | RT-PCR                    | < 5 years                | Not reported |
| Prasad et al. [76] 2020        | 2014-2016                              | Longitudinal    | Consecutive | Prospective   | New Zealand              | Western Pacific       | Nasopharyngeal secretions        | RT-PCR                    | < 1 year                 | Not reported |
| Presti et al. [77] 2023        | October 2021 to 15 March 2023.         | Longitudinal    | Consecutive | Retrospective | Italy                    | European              | Nasal secretions                 | PCR                       | 1 month to 18 years      | Not reported |
| Prucoli et al. [78] 2023       | 2019-2021                              | Longitudinal    | Consecutive | Prospective   | Italy                    | European              | Mixed*                           | Mixed¥                    | < 3 years                | 54.30%       |
| Qiu et al. [79] 2022           | January 1, 2019 to December 31, 2021.  | Cross-sectional | Consecutive | Retrospective | China                    | Western Pacific       | Oropharyngeal secretions         | Direct immunofluorescence | 28 days to 18 years old. | Not reported |
| Ramezannia et al. [80] 2021    | April 2019 to March 2020.              | Cross-sectional | Consecutive | Retrospective | Iran                     | Eastern Mediterranean | Throat swab                      | RT-PCR                    | < 5 years                | 56.0%        |
| Rha et al. [81] 2020           | November 1, 2015 to June 30, 2016      | Longitudinal    | Consecutive | Prospective   | United States of America | Americas              | Mixed*                           | RT-qPCR                   | < 5 years                | 56.3%        |
| Roland et al. [82] 2022        | 1 June to 5 December 2021.             | Longitudinal    | Consecutive | Prospective   | United Kingdom           | European              | Not reported                     | PCR                       | < 2 years                | Not reported |
| Sachs et al. [83] 2023         | November 2018 to January 2021          | Longitudinal    | Consecutive | Prospective   | Israel                   | European              | Nasal secretions                 | PCR                       | 0-18 years               | Not reported |
| Sarkar et al. [84] 2022        | December 2013 to March 2016.           | Cross-sectional | Consecutive | Prospective   | India                    | South-East Asia       | Nasopharyngeal secretions        | RT-PCR                    | > 2 months to > 5 years  | 65.0%        |

|                              |                                      |                 |             |               |                          |                 |                                  |                           |                       |              |
|------------------------------|--------------------------------------|-----------------|-------------|---------------|--------------------------|-----------------|----------------------------------|---------------------------|-----------------------|--------------|
| Savaş Şen et al. [85] 2022   | March 2016 to February 2017          | Cross-sectional | Consecutive | Retrospective | Turkey                   | European        | Nasopharyngeal secretions        | PCR                       | < 18 years            | 55.7%        |
| Shen et al. [86] 2022        | November 2016 to April 2017          | Cross-sectional | Consecutive | Prospective   | China                    | Western Pacific | Throat swab                      | Direct immunofluorescence |                       | 68.86%       |
| Shen et al. [87] 2022        | April 16, 2017 to April 15, 2021.    | Cross-sectional | Consecutive | Retrospective | Belgium                  | European        | Nasopharyngeal secretions or BLF | RT-PCR                    | < 6 years             | 53.6%        |
| Shi et al. [88] 2023         | 1 September 2021 to 31 December 2022 | Cross-sectional | Consecutive | Retrospective | China                    | Western Pacific | Nasopharyngeal secretions        | RT-PCR                    | < 16 years            | 56.40%       |
| Singh et al. [89] 2021       | January to December 2018             | Cross-sectional | Consecutive | Retrospective | India                    | South-East Asia | Nasopharyngeal secretions        | Antigen                   | < 10 years            | 70.0%        |
| Sobrinho et al. [90] 2021    | April 1, 2017 to August 31, 2018.    | Longitudinal    | Consecutive | Retrospective | Brazil                   | Americas        | Nasopharyngeal secretions        | Mixed                     | < 5 years             | 63.0%        |
| Song et al. [91] 2022        | April 1 to December 31, 2020.        | Cross-sectional | Consecutive | Retrospective | United States of America | Americas        | Not reported                     | RT-qPCR                   | < 18 years            | 56.0%        |
| Stera et al. [92] 2021       | October 1, 2017 to April 30, 2021.   | Cross-sectional | Consecutive | Retrospective | Italy                    | European        | Not reported                     | RT-PCR                    | < 1 year              | Not reported |
| Tang et al. [93] 2022        | January 2018 to December 2020.       | Cross-sectional | Consecutive | Retrospective | China                    | Western Pacific | Nasopharyngeal secretions or BLF | Direct immunofluorescence | 1 month to 15 years   | 57.63%       |
| Thongpan et al. [94] 2021    | July–December 2020                   | Longitudinal    | Consecutive | Prospective   | Thailand                 | South-East Asia | Nasopharyngeal secretions        | RT-PCR                    | ≤5 years              | 56.0%        |
| Thwaites et al. [95] 2018    | 2016-2017                            | Longitudinal    | Consecutive | Prospective   | United Kingdom           | European        | Nasopharyngeal secretions        | qPCR                      | 2 weeks to 2 years    | Not reported |
| Trenholme et al. [96] 2021   | 2015-2020                            | Cross-sectional | Consecutive | Retrospective | New Zealand              | Western Pacific | Nasopharyngeal secretions        | PCR                       | < 2 years             | Not reported |
| Tsergouli et al. [97] 2019   | 2016-2018                            | Cross-sectional | Consecutive | Prospective   | Greece                   | European        | Throat swab                      | RT-PCR                    | < 2 years             | 53.5%        |
| Valley-Omar et al. [98] 2022 | January 2012 to December 2015        | Cross-sectional | Consecutive | Prospective   | South Africa             | African         | Nasopharyngeal secretions        | Multiplex RT-PCR          | 3 months to < 5 years | 57.4%        |
| Varela et al. [99] 2022      | May to November 2020.                | Longitudinal    | Consecutive | Prospective   | Brazil                   | Americas        | Nasopharyngeal secretions        | RT-PCR                    | 2 months to 18 years  | 44.4%        |
| Virant et al. [100] 2023     | From January 2018 to December 2021   | Cross-sectional | Consecutive | Prospective   | Slovenia                 | European        | Nasopharyngeal secretions        | RT-PCR                    | 0 to 18 years         | 56.30%       |
| Vittucci et al. [101] 2021   | September 2018 to February 2021.     | Cross-sectional | Consecutive | Retrospective | Italy                    | European        | Nasopharyngeal secretions        | RT-PCR                    | < 18 years            | Not reported |

|                               |                                        |                 |             |               |                          |                 |                                  |                           |                     |              |
|-------------------------------|----------------------------------------|-----------------|-------------|---------------|--------------------------|-----------------|----------------------------------|---------------------------|---------------------|--------------|
| Wang et al. [102] 2019        | January to June 2018                   | Cross-sectional | Consecutive | Prospective   | China                    | Western Pacific | Sputum                           | Multiplex PCR             | < 13 years          | 61.1%        |
| Watanabe et al. [103] 2022    | March to August 2019.                  | Cross-sectional | Consecutive | Prospective   | Brazil                   | Americas        | Nasopharyngeal secretions        | RT-PCR                    | < 2 years           | 65.8%        |
| Weldetsadik et al. [104] 2021 | June 2018 to May 2019.                 | Cross-sectional | Consecutive | Prospective   | Ethiopia                 | African         | Nasopharyngeal secretions        | Antigen                   | 29 days to 6 months | 65.0%        |
| Wen et al. [105] 2020         | January 1, 2008, to December 31, 2017. | Cross-sectional | Consecutive | Retrospective | China                    | Western Pacific | Nasopharyngeal secretions        | Direct immunofluorescence | < 18 years          | Not reported |
| Windsor et al. [106] 2022     | December 2018 to December 2019.        | Longitudinal    | Random      | Prospective   | United States of America | Americas        | Nasopharyngeal secretions        | Multiplex PCR             | 1 month to 18 years | 56.0%        |
| Xia et al. [107] 2023         | January 2017 to December 2021          | Cross-sectional | Consecutive | Retrospective | China                    | Western Pacific | Not reported                     | Antigen                   | ≤ 7 years           | 59.6%        |
| Xu et al. [108] 2022          | February 2019 to January 2021.         | Cross-sectional | Consecutive | Retrospective | China                    | Western Pacific | Nasopharyngeal secretions or BLF | Multiplex PCR             | < 18 years          | 60.76%       |
| Yan et al. [109] 2023         | January 2018 to December 2019          | Longitudinal    | Consecutive | Prospective   | China                    | Western Pacific | Sputum                           | Multiplex PCR             | < 15 years          | 57.90%       |
| Ye et al. [110] 2022          | January 2019 to December 2020          | Cross-sectional | Consecutive | Retrospective | China                    | Western Pacific | Nasopharyngeal secretions or BLF | Direct immunofluorescence | < 18 years          | 57.32%       |
| Zhao et al. [111] 2019        | December 2017 to March 2018            | Cross-sectional | Consecutive | Prospective   | China                    | Western Pacific | Nasopharyngeal secretions        | Direct immunofluorescence | < 5 years           | Not reported |
| Zhao et al. [112] 2022        | January 2019 to March 2020             | Longitudinal    | Consecutive | Prospective   | China                    | Western Pacific | Sputum                           | Multiplex RT-PCR          | < 13 years          | 61.04%       |

¥Mixed assays: Antigen testing/RT-PCR; or Direct immunofluorescence/RT-qPCR/antigen testing; or Direct immunofluorescence/RT-PCR; or Indirect immunofluorescence/PCR. \$The indicated diagnostic technique is according to what is referred to by the authors. \*Mixed specimens: Nasopharyngeal secretions and nasal secretions; or Nasal and throat secretions. Abbreviations: WHO, World Health Organization; BLF, Bronchoalveolar lavage fluid.

**Table S7. Definitions of lower respiratory tract infection according to each study.**

| <b>Study</b>                    | <b>Definition of lower respiratory tract infection</b>                                                                                                                                                                                                                                                                                                                                                                                                                                                                                                                                                                                                                                                                                                      |
|---------------------------------|-------------------------------------------------------------------------------------------------------------------------------------------------------------------------------------------------------------------------------------------------------------------------------------------------------------------------------------------------------------------------------------------------------------------------------------------------------------------------------------------------------------------------------------------------------------------------------------------------------------------------------------------------------------------------------------------------------------------------------------------------------------|
| Agca et al. [1]                 | Children with nasal congestion, sneezing, sore throat, rhin-orrhea, nasal discharge, and cough.                                                                                                                                                                                                                                                                                                                                                                                                                                                                                                                                                                                                                                                             |
| Akkoc et al. [2]                | LRTIs were diagnosed clinically and defined as having at least two of the complaints following fever, cough or wheezing and crackles, and/or rhonchi on physical examination.                                                                                                                                                                                                                                                                                                                                                                                                                                                                                                                                                                               |
| Al-Zayadneh et al. [3]          | Children hospitalized with febrile illness (>38.0°C) and were diagnosed as LRTI if they presented with cough, difficulty breathing, and signs indicative of LRTI such as tachypnea, retraction, grunting, flaring, and auscultatory findings such as wheezing or crackles.                                                                                                                                                                                                                                                                                                                                                                                                                                                                                  |
| Assane et al. [4]               | Upper or lower airway infection.                                                                                                                                                                                                                                                                                                                                                                                                                                                                                                                                                                                                                                                                                                                            |
| Baldassarre et al. [5]          | Classification of Diseases, Ninth Revision, Clinical Modification (ICD-9-CM): 079.6 (RSV infection), 466.1 (acute bronchiolitis), 466.11 (acute bronchiolitis due to RSV), and 466.19 (acute bronchiolitis due to pathogens other than RSV).                                                                                                                                                                                                                                                                                                                                                                                                                                                                                                                |
| Barbati et al. [6]              | LRTI in hospitalized children                                                                                                                                                                                                                                                                                                                                                                                                                                                                                                                                                                                                                                                                                                                               |
| Bedir Demirdağ et al. [7]       | LRTI in hospitalized children                                                                                                                                                                                                                                                                                                                                                                                                                                                                                                                                                                                                                                                                                                                               |
| Ben-Shimol et al. [8]           | Community-acquired Alveolar Pneumonia: This includes hospitalized children less than 18 months old (2–17 months) with radiographically confirmed alveolar pneumonia as per the World Health Organization pneumonia protocol for radiography reading. Bronchiolitis: This includes hospitalized children less than 18 months old (2–17 months) with acute respiratory infection judged by the clinician to have bronchiolitis (including dyspnea, wheezing, and negative chest radiography for alveolar infiltrates). Since ruling out pneumonia in children with clinical bronchiolitis is difficult, we further excluded those with peripheral white blood cell (WBC) counts of $\geq 20,000/\text{mm}^3$ and rectal temperature $\geq 39^\circ\text{C}$ . |
| Berdah et al. [9]               | ICD-10 code diagnoses of bronchiolitis (J21.0, J21.1, J21.8 and J21.9).                                                                                                                                                                                                                                                                                                                                                                                                                                                                                                                                                                                                                                                                                     |
| Bermúdez Barrezueta et al. [10] | Bronchiolitis was defined as the first episode of respiratory distress coursing with wheezing and/or cracklingrales and is preceded by catarrhal clinical symptoms of the upperairways                                                                                                                                                                                                                                                                                                                                                                                                                                                                                                                                                                      |
| Bhardwaj et al. [11]            | Patients with a history of cough that began during the past seven days and that required overnight hospitalization. SARI was defined in babies < 2 months of age as a physician diagnosis consistent with an acute lower respiratory infection (pneumonia, bronchitis, bronchiolitis, sepsis) necessitating overnight hospitalization.                                                                                                                                                                                                                                                                                                                                                                                                                      |
| Brisca et al. [12]              | International Classification of Diseases 9th review (ICD-9) diagnosis of “acute bronchiolitis” (code 466.19)                                                                                                                                                                                                                                                                                                                                                                                                                                                                                                                                                                                                                                                |
| Buendía et al. [13]             | Children admitted to the pediatric ward diagnosed with bronchiolitis, according to the colombian national clinical guideline of bronchiolitis (first wheezing episode younger than 24 months of age).                                                                                                                                                                                                                                                                                                                                                                                                                                                                                                                                                       |
| Buendía et al. [14]             | RSV LRTI (ICD-10 code: J21.0) according to the National clinical guideline of bronchiolitis (first wheezing episode younger than 24 months of age).                                                                                                                                                                                                                                                                                                                                                                                                                                                                                                                                                                                                         |

|                             |                                                                                                                                                                                                                                                                                                                                                                                                                                                                                                                                                                                                                                                                                                                                             |
|-----------------------------|---------------------------------------------------------------------------------------------------------------------------------------------------------------------------------------------------------------------------------------------------------------------------------------------------------------------------------------------------------------------------------------------------------------------------------------------------------------------------------------------------------------------------------------------------------------------------------------------------------------------------------------------------------------------------------------------------------------------------------------------|
| Camporesi et al. [15]       | Bronchiolitis was defined as the presence of respiratory distress and signs of lower respiratory tract infection [1] (e.g., cough, tachypnoea or chest recession, and wheeze or crackles on chest auscultation) or a first episode of acute viral wheeze.                                                                                                                                                                                                                                                                                                                                                                                                                                                                                   |
| Camporesi et al. [16]       | Clinical diagnosis of bronchiolitis (e.g., children with cough, tachypnoea or chest recession, and wheeze or crackles on chest auscultation) or a first episode of acute viral wheeze.                                                                                                                                                                                                                                                                                                                                                                                                                                                                                                                                                      |
| Cao et al. [17]             | Severe acute respiratory infection (SARI) case definition is based on the 2011 WHO criteria for children > 5 years, characterized by a sudden onset of fever (> 38°C) along with cough or sore throat, in the absence of an alternative diagnosis, coupled with shortness of breath or difficulty in breathing, necessitating hospital admission. For patients < 5 years, SARI is identified by cough or difficulty in breathing with a respiratory rate exceeding 40 breaths/min (ages 1–5 years) or 50 breaths/min (ages 2–12 months). Other indicators include difficulty in drinking or breastfeeding, vomiting, convulsions, lethargy, unconsciousness, chest indrawing, or stridor in a calm child, all requiring hospital admission. |
| Carlone et al. [18]         | Bronchiolitis                                                                                                                                                                                                                                                                                                                                                                                                                                                                                                                                                                                                                                                                                                                               |
| Chandy et al. [19]          | WHO criteria for pneumonia with tachypnea or wheeze with or without hypoxia.                                                                                                                                                                                                                                                                                                                                                                                                                                                                                                                                                                                                                                                                |
| Chu et al. [20]             | LRTI is defined by symptoms of cough or difficult breathing and any of the following: lower chest wall in-drawing, fast breathing in accordance with the WHO clinical criteria. Clinical syndromes of bronchitis, bronchiolitis, pneumonia, and acute asthma exacerbations are included in LRTI.                                                                                                                                                                                                                                                                                                                                                                                                                                            |
| Coma et al. [21]            | Children with clinical diagnosis of suspected RSV infection according to ICD-10 codes registered in the EHR: J21 (Acute bronchiolitis), J21.0 (Acute bronchiolitis due to RSV), J21.9 (Acute bronchiolitis, unspecified), and B97.4 (Respiratory syncytial virus as the cause of diseases classified elsewhere).                                                                                                                                                                                                                                                                                                                                                                                                                            |
| Curatola et al. [22]        | Acute bronchiolitis                                                                                                                                                                                                                                                                                                                                                                                                                                                                                                                                                                                                                                                                                                                         |
| Curatola et al. [23]        | Diagnosis of acute bronchiolitis admitted to hospital.                                                                                                                                                                                                                                                                                                                                                                                                                                                                                                                                                                                                                                                                                      |
| De Rose et al. [24]         | Bronchiolitis was characterized by coryza, persistent cough, and respiratory distress in the presence of wheezing or crackles during chest auscultation.                                                                                                                                                                                                                                                                                                                                                                                                                                                                                                                                                                                    |
| Diesner-Treiber et al. [25] | Infants with with at least one of the following symptoms: rhinitis, nasal congestion, cough, sore throat or fever of unknown origin (e.g., without gastroenteritis or urinary tract infection) with a maximum duration of one week.                                                                                                                                                                                                                                                                                                                                                                                                                                                                                                         |
| Esen et al. [26]            | Lower tract symptoms were classified by the presence of fever, tachypnoea, rhonchi with a respiratory rate as per minute, wheezing, focal or diffuse crackles or decreased vesicular sounds on auscultation and retraction at the end of expiration. Pneumonia was diagnosed according to both clinical or radiologic manifestations in the patient.                                                                                                                                                                                                                                                                                                                                                                                        |
| Faraguna et al. [27]        | Clinical diagnosis of bronchiolitis (e.g., children with rhinorrhea, cough, crackles, wheezing, dyspnea, polypnea, feeding difficulties, apnea, lethargy).                                                                                                                                                                                                                                                                                                                                                                                                                                                                                                                                                                                  |
| Feng et al. [28]            | Patients diagnosed with CAP by meeting any of the following criteria were included: Increased symptoms of cough, expectoration, or preexisting respiratory diseases and purulent sputum with or without chest pain; fever; signs of pulmonary consolidation and/or audible and moist rales; white blood cell (WBC) count $>10 \times 10^9/L$ or $<4 \times 10^9/L$ , with or without nucleus left; chest X-ray showing patchy, invasive, or interstitial changes with or without pleural effusion.                                                                                                                                                                                                                                          |

|                                |                                                                                                                                                                                                                                                                                                                                                                                                                                                                                                                                                                                                                                                       |
|--------------------------------|-------------------------------------------------------------------------------------------------------------------------------------------------------------------------------------------------------------------------------------------------------------------------------------------------------------------------------------------------------------------------------------------------------------------------------------------------------------------------------------------------------------------------------------------------------------------------------------------------------------------------------------------------------|
| Foley et al. [29]              | ICD 10th edition Australian Modification for LRTI (J9–J18, J20 and J22) and bronchiolitis (J21).                                                                                                                                                                                                                                                                                                                                                                                                                                                                                                                                                      |
| Giamberardino et al. [30]      | LRTI in hospitalized children                                                                                                                                                                                                                                                                                                                                                                                                                                                                                                                                                                                                                         |
| Gonapaladeniya et al. [31]     | Community-Acquired Pneumonia was defined as the presence of fever, cough, abnormal chest signs (localized crackles or increased vocal resonance or reduced breath sounds), and tachypnoea.                                                                                                                                                                                                                                                                                                                                                                                                                                                            |
| Grochowska et al. [32]         | LRTI based on ICD-10 code (1) viral infections (J12, J20, J21, J40), including bronchiolitis (J21); (2) influenza or flu-like infection (J10, J11); (3) bacterial infections (J13; J14; J15, J16, J18, J20.                                                                                                                                                                                                                                                                                                                                                                                                                                           |
| Guerrero-Del-Cueto et al. [33] | ICD-10 code "J21—Acute bronchiolitis"                                                                                                                                                                                                                                                                                                                                                                                                                                                                                                                                                                                                                 |
| Guitart et al. [34]            | Clinical findings of sever bronchiolitis according to Bronchiolitis Score of Sant Joan de Déu (BROSJOD) and the Pediatric Risk of Mortality Score III scale (PRISM III).                                                                                                                                                                                                                                                                                                                                                                                                                                                                              |
| Haddadin et al. [35]           | Infants with fever and/or respiratory symptoms (ie, wheezing, crackles, rales, diminished breath sounds, shortness of breath cough, earache, nasal congestion, rhinorrhea, and/or sore throat) within 14 days of symptom onset.                                                                                                                                                                                                                                                                                                                                                                                                                       |
| Havdal et al. [36]             | Diagnosis with RSV-specific ICD-10 codes (J20.5; J21.0; J12.1; B97.4).                                                                                                                                                                                                                                                                                                                                                                                                                                                                                                                                                                                |
| Hu et al. [37]                 | LRTI included bronchiolitis and pneumonia.                                                                                                                                                                                                                                                                                                                                                                                                                                                                                                                                                                                                            |
| Ippolito et al. [38]           | Diagnosis of bronchiolitis or community acquired pneumonia which was confirmed by an expert physician.                                                                                                                                                                                                                                                                                                                                                                                                                                                                                                                                                |
| Jiang et al. [39]              | Severe community-acquired pneumonia cases were defined as meeting any of the following criteria: Poor general condition, Disturbance of consciousness, Hypoxemia: cyanosis, rapid respiration, $RR \geq 70$ breaths/min (infant), $RR \geq 50$ breaths/min (1-year-old or older), assisted breathing (groaning, nasal fanning, trisplegia), intermittent apnea, oxygen saturation $<92\%$ , Hyperthermia, persistent hyperthermia for more than 5 days, Dehydration or food refusal, Chest radiograph or CT $\geq 2/3$ side lung infiltration, lobar lung infiltration, pleural effusion, pneumothorax, atelectasis, lung necrosis, and lung abscess. |
| Jiang et al. [40]              | LRTI was considered as fever (defined as body temperature $\geq 38^{\circ}\text{C}$ ), and had clinical (chest retractions, tachypnea, nasal flaring, hypoxia, or abnormal auscultatory findings) and radiologic evidence of pneumonia.                                                                                                                                                                                                                                                                                                                                                                                                               |
| Jiang et al. [41]              | Clinical evidence of bronchiolitis (tachypnea, wheeze, prolonged expiratory phase, and crackles on auscultation).                                                                                                                                                                                                                                                                                                                                                                                                                                                                                                                                     |
| Jullien et al. [42]            | WHO-defined pneumonia                                                                                                                                                                                                                                                                                                                                                                                                                                                                                                                                                                                                                                 |
| Kang et al. [43]               | Clinical diagnosis of acute lower respiratory tract infections (ALRTIs), including Acute Viral Bronchiolitis (AVB), pneumonia, and Acute Respiratory Distress Syndrome (ARDS), was established, and these cases were confirmed as negative for SARS-CoV-2 during the pandemic.                                                                                                                                                                                                                                                                                                                                                                        |
| Kıymet et al. [44]             | LRTI in hospitalized children                                                                                                                                                                                                                                                                                                                                                                                                                                                                                                                                                                                                                         |
| Knudsen et al. [45]            | ICD-10 diagnoses; J21 Acute bronchiolitis, J12 Viral pneumonia and J13 + J14 + J15 Bacterial pneumonia.                                                                                                                                                                                                                                                                                                                                                                                                                                                                                                                                               |
| Kockuzu et al. [46]            | Respiratory tract infections in patients hospitalized in pediatric intensive care.                                                                                                                                                                                                                                                                                                                                                                                                                                                                                                                                                                    |
| Komoyo et al. [47]             | History of fever $\geq 38^{\circ}\text{C}$ and cough with onset within the last 10 days requiring hospitalization.                                                                                                                                                                                                                                                                                                                                                                                                                                                                                                                                    |

|                            |                                                                                                                                                                                                                                                                                                                                                                                                                                           |
|----------------------------|-------------------------------------------------------------------------------------------------------------------------------------------------------------------------------------------------------------------------------------------------------------------------------------------------------------------------------------------------------------------------------------------------------------------------------------------|
| Korsun et al. [48]         | ARIs were defined according to the ECDC.                                                                                                                                                                                                                                                                                                                                                                                                  |
| Kume et al. [49]           | LRTI in hospitalized children                                                                                                                                                                                                                                                                                                                                                                                                             |
| Kurskaya et al. [50]       | Children who had at least one of the systemic symptoms (fever, headache, myalgia, or malaise) and one of the respiratory symptoms (cough, rhinorrhea, nasal congestion, sore throat, shortness of breath, lung auscultation abnormalities, chest pain).                                                                                                                                                                                   |
| Lagare et al. [51]         | ARI was defined as a hospitalized child aged younger than 5 years with onset of fever 38°C or higher and cough within 10 days prior to admission and at least one of the following signs: inability to drink or breastfeed, lethargy, vomiting, convulsions, nasal flaring, chest indrawing, stridor in a calm child, or tachypnea.                                                                                                       |
| Lamrani Hanchi et al. [52] | As a diagnosis of severe bronchiolitis, pneumonia, respiratory distress, influenza syndrome in immunocompromised children, or a clinical suspicion of pertussis that required a hospitalization in the pediatric departments.                                                                                                                                                                                                             |
| Li et al. [53]             | Pneumonia cases were defined according to the Subspecialty Group of Respiratory Diseases, The Society of Pediatrics, Chinese Medical Association; Editorial Board, Chinese Journal of Pediatrics. Guidelines for management of community-acquired pneumonia in children (the revised edition of 2013) (I). Zhonghua Er Ke Za Zhi 2013;51:745-52.                                                                                          |
| Li et al. [54]             | ALRTI was defined as the presence of signs and symptoms of respiratory tract infection (i.e., fever $\geq 38^{\circ}\text{C}$ , coughing, rhinorrhea, oropharyngeal hyperemia, and swelling of tonsils), lower respiratory signs (tachypnea, dyspnea, retractions, wheezing, or rales upon auscultation), and lung infiltrates indicated by chest radiography.                                                                            |
| Li et al. [55]             | Children with $\leq 3$ days of fever (temperature $\geq 37.5^{\circ}\text{C}$ ), and with cough, sputum, throat sore, dyspnea and/or other acute respiratory tract infection symptoms.                                                                                                                                                                                                                                                    |
| Li et al. [56]             | Community-acquired pneumonia                                                                                                                                                                                                                                                                                                                                                                                                              |
| Liu et al. [57]            | LRTI was considered if children have at least 1 of the following manifestations: confirmed fever (38°C), abnormal white blood cell (WBC) differential, leukocytosis (a WBC count of $>10,000/\text{mL}$ ) or leukopenia (a WBC count of $<4,000/\text{mL}$ ), and chills; and at least 1 of the following signs/symptoms of LRTI: sputum, shortness of breath, lung auscultation abnormality (rale or wheeze), tachypnea, and chest pain. |
| Liu et al. [58]            | Children were considered to have an LRTI if they had at least one of the following manifestations of acute infection: confirmed fever (38 °C), abnormal white blood cells differential such as leukocytosis or leukopenia, and chills; at least one of the following signs/symptoms of respiratory tract infection: cough, sputum, shortness of breath, lung auscultation abnormality (rale or wheeze), tachypnea, and chest pain.        |
| Lucion et al. [59]         | Bronchiolitis: first wheezing event associated with clinical evidence of viral infection in children younger than 2 years.<br>Pneumonia: acute infection of the lung parenchyma with clinical signs of invasion of the alveolar space.                                                                                                                                                                                                    |
| Ma et al. [60]             | LRTI in hospitalized children                                                                                                                                                                                                                                                                                                                                                                                                             |
| Mackenzie et al. [61]      | LRTI was defined as cough or difficulty breathing for 14 days or less and one or more of the following: raised respiratory rate for age, lower chest wall indrawing, nasal flaring, grunting, oxygen saturation $<92\%$ , altered consciousness, prostration, seizures, dull chest percussion note, coarse crackles, or bronchial breathing.                                                                                              |

|                           |                                                                                                                                                                                                                                                                                                                                                                         |
|---------------------------|-------------------------------------------------------------------------------------------------------------------------------------------------------------------------------------------------------------------------------------------------------------------------------------------------------------------------------------------------------------------------|
| Maglione et al. [62]      | ARI was defined as an acute respiratory illness with a history of fever or measured fever of $\geq 38^{\circ}\text{C}$ and cough, with onset within the past 10 days, requiring hospitalization. Also included patients without fever, but with cough, nasal obstruction, nasal flaring, tachypnea, and/or hypoxia, fulfilling the clinical definition of bronchiolitis |
| Maruo et al. [63]         | LRTI in hospitalized children                                                                                                                                                                                                                                                                                                                                           |
| Mira-Iglesias et al. [64] | The onset of symptoms that led to hospitalization was required to be 7 days prior to admission, and patients had to be in hospital between 8 and 48 h before their inclusion in the study. Infants with acute respiratory infection according to ICD-10 code; LRTI (J09-J22), bronchiolitis (J21), and pneumonia (J12-J18).                                             |
| Moreira et al. [65]       | Acute respiratory symptoms and were admitted to the infirmary or pediatric intensive care units (ICU), severe acute respiratory syndrome (SARS) who were seen at integrated health care centers or other inpatient services.                                                                                                                                            |
| Nenna et al. [66]         | Bronchiolitis, asthmatic bronchitis and pneumonia.                                                                                                                                                                                                                                                                                                                      |
| Nenna et al. [67]         | The respiratory score included the child's color, respiratory rate, presence of wheeze, use of accessory muscles, mental status, and oxygen saturation.                                                                                                                                                                                                                 |
| Ng et al. [68]            | As the presence of cough or difficulty breathing with signs of severe respiratory distress, requiring high dependency care in the pediatric respiratory ward or admission to the pediatric ICU.                                                                                                                                                                         |
| Núñez-Samudio et al. [69] | Children with respiratory symptoms, and the following admission diagnoses from the ICD-10 [1]: suspected influenza due to unidentified influenza virus with other respiratory manifestations (J11.1), pneumonia, unspecified organism (J18), acute bronchiolitis (J21) and unspecified asthma with acute exacerbation (J45.901).                                        |
| Nunziata et al. [70]      | Bronchiolitis was defined according to the Guideline Development Group and Technical Team. Bronchiolitis in children: Summary of NICE guidance. BMJ 2015, 350, h2305.                                                                                                                                                                                                   |
| Oumei et al. [71]         | Pneumonia cases were defined using the Child Community-Acquired Pneumonia Guidelines of the Chinese Medicine Association.                                                                                                                                                                                                                                               |
| Pale et al. [72]          | SARI was defined according to WHO definition, as any severe patient (requiring hospitalization) with acute symptoms (within the last 10 days of onset of disease); and respiratory infection (defined as the presence of cough, but in some sites defined as cough or shortness of breath).                                                                             |
| Pierangeli et al. [73]    | ECDC definition of ILI, i.e., fever (temperature $\geq 37.8^{\circ}\text{C}$ ), with at least one systemic symptom (i.e., headache, asthenia, myalgia), and at least one respiratory symptom (i.e., cough, dyspnea, acute pharyngitis).                                                                                                                                 |
| Pogonowska et al. [74]    | Children with a diagnosis of bronchiolitis, pneumonia or obstructive bronchitis of RSV aetiology were included in the study.                                                                                                                                                                                                                                            |
| Prasad et al. [75]        | ARI was defined based on ICD-10 code such as B974, J121, J210, and J205.                                                                                                                                                                                                                                                                                                |
| Prasad et al. [76]        | ARI-associated if infants presented with at least one of the following signs or symptoms: apnea, cyanosis, shortness of breath, cough, wheeze, increased work of breathing, stridor, and fever.                                                                                                                                                                         |
| Presti et al. [77]        | Respiratory illness                                                                                                                                                                                                                                                                                                                                                     |



|                        |                                                                                                                                                                                                                                                                                                                                                                                                                                                                                                  |
|------------------------|--------------------------------------------------------------------------------------------------------------------------------------------------------------------------------------------------------------------------------------------------------------------------------------------------------------------------------------------------------------------------------------------------------------------------------------------------------------------------------------------------|
| Pruccoli et al. [78]   | Bronchiolitis and/or pneumonia                                                                                                                                                                                                                                                                                                                                                                                                                                                                   |
| Qiu et al. [79]        | Fever and lower respiratory tract symptoms, such as tachypnea, nonproductive cough, wheeze, and increased breath sound such as rales or wheezes or chest imaging findings (bronchitis or pneumonia) to be met, including the diagnosis of pneumonia, bronchitis, bronchiolitis and prolonged pneumonia.                                                                                                                                                                                          |
| Ramezannia et al. [80] | Children with fever, wheezing, cough, vomiting, diarrhea, pneumonia, runny nose, cyanosis, tachypnea, and dyspnea.                                                                                                                                                                                                                                                                                                                                                                               |
| Rha et al. [81]        | LRTI in hospitalized children                                                                                                                                                                                                                                                                                                                                                                                                                                                                    |
| Roland et al. [82]     | Infant diagnosed as bronchiolitis, lower respiratory tract infection or first episode of acute wheeze.                                                                                                                                                                                                                                                                                                                                                                                           |
| Sachs et al. [83]      | LRTI was defined when wheezing or increased breath sound over the lungs or signs of inflammation over the lung parenchyma in chest X-ray were detected.                                                                                                                                                                                                                                                                                                                                          |
| Sarkar et al. [84]     | LRTI such as bronchiolitis, pneumonia, and wheezing illness, attending a pediatric emergency room and intensive care unit were included.                                                                                                                                                                                                                                                                                                                                                         |
| Savaş Şen et al. [85]  | Patients < 2 years with mild fever and wheezing, sibilant rhonchi and rals on auscultation, normal or slightly elevated white blood cell count in laboratory tests, and increased aeration and/or peribronchial infiltration on chest X-ray were diagnosed with acute bronchiolitis. Patients with consolidation on chest X-rays were defined as pneumonia. Patients > 2 years and admitted to the hospital for the first time with a wheezing episode were evaluated as virus-induced wheezing. |
| Shen et al. [86]       | Patients with respiratory symptoms such as cough, rhinorrhea, nasal congestion, sneezing and signs of LRTI such as respiratory distress, crackles, wheezing, or chest-X ray infiltrates.                                                                                                                                                                                                                                                                                                         |
| Shen et al. [87]       | LRTI in hospitalized children                                                                                                                                                                                                                                                                                                                                                                                                                                                                    |
| Shi et al. [88]        | All children who were admitted to the Children's Hospital of Soochow University were hospitalized with symptoms of respiratory distress.                                                                                                                                                                                                                                                                                                                                                         |
| Singh et al. [89]      | LRTI in hospitalized children                                                                                                                                                                                                                                                                                                                                                                                                                                                                    |
| Sobrinho et al. [90]   | The clinical diagnosis of LRTI was defined by the presence of cough, tachypnea, respiratory distress with prolonged expiratory time and wheezing or crackles on auscultation.                                                                                                                                                                                                                                                                                                                    |
| Song et al. [91]       | LRTI in hospitalized children                                                                                                                                                                                                                                                                                                                                                                                                                                                                    |
| Stera et al. [92]      | Bronchiolitis was defined by the ICD-9 (466.11 and 466.19). Hospitalization criteria were considered according to the most recently updated Italian Inter-Society Consensus for bronchiolitis.                                                                                                                                                                                                                                                                                                   |
| Tang et al. [93]       | LRTI in hospitalized children                                                                                                                                                                                                                                                                                                                                                                                                                                                                    |
| Thongpan et al. [94]   | Influenza-like illness                                                                                                                                                                                                                                                                                                                                                                                                                                                                           |
| Thwaites et al. [95]   | LRTI diagnosis was based on standard clinical criteria (cough, tachypnea, wheezes and crackles on auscultation, and hyperinflation).                                                                                                                                                                                                                                                                                                                                                             |
| Trenholme et al. [96]  | LRTI (codes J22, A37, J47, J10.0 J10.1 J11.1, J12–16, J20, J21, and J18 from the ICD-10)                                                                                                                                                                                                                                                                                                                                                                                                         |
| Tsergouli et al. [97]  | Bronchiolitis                                                                                                                                                                                                                                                                                                                                                                                                                                                                                    |

|                          |                                                                                                                                                                                                                                                                                                                                                                                                                                                                                                                                                                |
|--------------------------|----------------------------------------------------------------------------------------------------------------------------------------------------------------------------------------------------------------------------------------------------------------------------------------------------------------------------------------------------------------------------------------------------------------------------------------------------------------------------------------------------------------------------------------------------------------|
| Valley-Omar et al. [98]  | Children with physician-diagnosed LRTI, including bronchitis, bronchiolitis, pneumonia, and pleural effusion.                                                                                                                                                                                                                                                                                                                                                                                                                                                  |
| Varela et al. [99]       | The main inclusion criteria were the presence of at least one sign or symptom suggestive of COVID-19 (cough, fever, or sore throat).                                                                                                                                                                                                                                                                                                                                                                                                                           |
| Virant et al. [100]      | Lower respiratory tract infections.                                                                                                                                                                                                                                                                                                                                                                                                                                                                                                                            |
| Vittucci et al. [101]    | LRTI in hospitalized children                                                                                                                                                                                                                                                                                                                                                                                                                                                                                                                                  |
| Wang et al. [102]        | LRTI was diagnosed based on the clinical and radiologic findings, including pneumonia, bronchitis and bronchiolitis.                                                                                                                                                                                                                                                                                                                                                                                                                                           |
| Watanabe et al. [103]    | Clinical diagnosis of bronchiolitis and no expected discharge in the next 24 hours.                                                                                                                                                                                                                                                                                                                                                                                                                                                                            |
| Weldetsadik et al. [104] | Severe LRTI: Acute onset (less than 7 days) with respiratory symptoms (cough, dyspnea, wheezing, tachypnea, and grunting) requiring hospitalization.                                                                                                                                                                                                                                                                                                                                                                                                           |
| Wen et al. [105]         | LRTI was considered as bronchitis, bronchiolitis, or pneumonia.                                                                                                                                                                                                                                                                                                                                                                                                                                                                                                |
| Windsor et al. [106]     | LRTI in hospitalized children                                                                                                                                                                                                                                                                                                                                                                                                                                                                                                                                  |
| Xia et al. [107]         | Clinical signs and symptoms of respiratory infection such as fever, pneumonia, bronchitis, capillary bronchitis, tonsillitis, and pharyngitis.                                                                                                                                                                                                                                                                                                                                                                                                                 |
| Xu et al. [108]          | LRTI was defined as presenting with at least one of the following signs/symptoms: fever, cough, sputum, shortness of breath, lung auscultation abnormality (rale or wheeze), tachypnea, and chest pain.                                                                                                                                                                                                                                                                                                                                                        |
| Yan et al. [109]         | All patients were examined and diagnosed clinically by the pediatrician, and the clinical criteria of pneumonia, bronchitis, and bronchiolitis are defined according to World Health Organization guidelines of common childhood illnesses including respiratory symptoms and chest radiographic findings.                                                                                                                                                                                                                                                     |
| Ye et al. [110]          | Fever ( $> 37.5^{\circ}\text{C}$ ); one or more respiratory symptoms within 14 days of onset (cough, sore throat, sputum, shortness of breath, lung auscultation abnormality (rale or wheeze), tachypnea, and chest pain).                                                                                                                                                                                                                                                                                                                                     |
| Zhao et al. [111]        | ARI was mainly presenting with bronchiolitis or pneumonia.                                                                                                                                                                                                                                                                                                                                                                                                                                                                                                     |
| Zhao et al. [112]        | 1. Acute infection: fever or hypothermia, or an abnormal WBC distribution, 2. Respiratory tract symptom(s): at least one of cough, runny nose, wheezing/gasping, pharyngeal congestion, enlargement of lymph nodes, enlargement of tonsils, moist rales/moist crackles, dry rales/rhonchi, coarse breath sounds, shortness of breath, dyspnoea, or cyanosis, temporary sleep apnoea, or hypoxemia (oxygen saturation $< 92\%$ ). 3. Radiological manifestations. Patients were enrolled if they met both criteria 1 and 2, criterion 3, or all three criteria. |

Abbreviations: ARI, Acute respiratory infections; ECDC, European Centre for Disease Prevention and Control; ICD-10, International Classification of Diseases-10th revision; LRTI, Lower respiratory tract infections; RSV, Respiratory syncytial virus; SARI, Severe acute respiratory infection; WHO, World Health Organization.

Figure S1. Respiratory syncytial virus (RSV) prevalences according to RSV season.

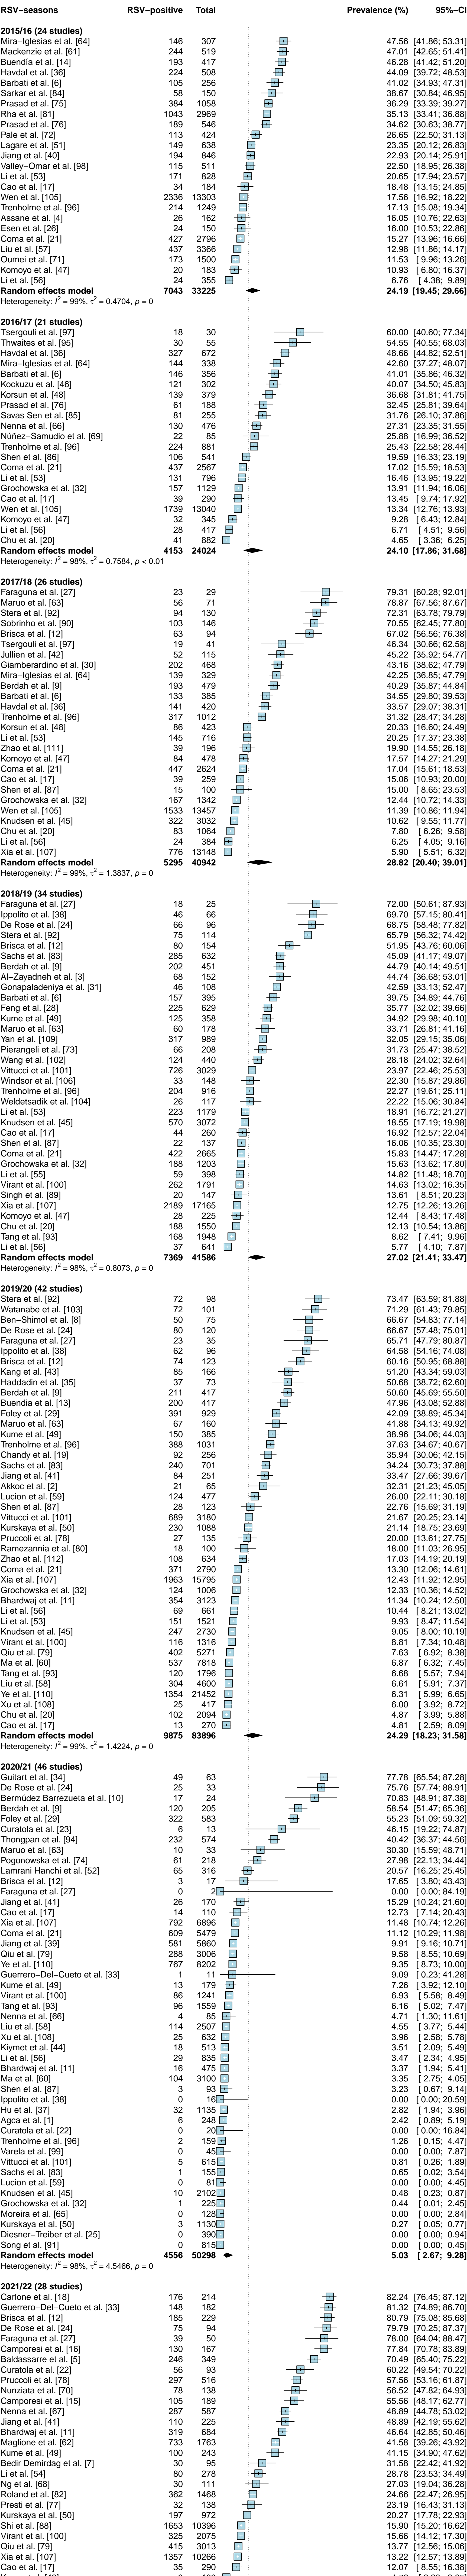



**Table S8. Sensitivity analysis of pooled respiratory syncytial virus (RSV) prevalence in children diagnosed with RSV-related lower respiratory tract infection by molecular assays.**

| Groups                   | Studies (n) | RSV-positive (n) | Total (n) | Pooled prevalence (95%CI) | Q-value  | I <sup>2</sup> (%) | P-Value Heterogeneity | P-Value Egger test | P-Value subgroup difference |
|--------------------------|-------------|------------------|-----------|---------------------------|----------|--------------------|-----------------------|--------------------|-----------------------------|
| <b>Overall</b>           | 85          | 22523            | 103157    | 24.96 [20.77; 29.69]      | 10441.27 | 98.5               | < 0.0001              | 0.0350             | NA                          |
| <b>Subgroup analyses</b> |             |                  |           |                           |          |                    |                       |                    |                             |
| <b>Period</b>            |             |                  |           |                           |          |                    |                       |                    | < 0.0001                    |
| Pre-pandemic (2015/20)   | 59          | 15483            | 65335     | 30.45 [26.68; 34.49]      | 5723.37  | 98.20              | < 0.0001              | 0.0243             |                             |
| Lockdown (2020/21)       | 31          | 1610             | 16828     | 3.82 [1.53; 9.22]         | 1767.6   | 98.30              | < 0.0001              | 0.2778             |                             |
| Post-lockdown (2021/22)  | 24          | 5430             | 20994     | 44.29 [32.61; 56.63]      | 2586.72  | 99.10              | < 0.0001              | 0.0012             |                             |
| <b>Seasons</b>           |             |                  |           |                           |          |                    |                       |                    | < 0.0001                    |
| 2015/16                  | 17          | 3259             | 10642     | 27.90 [22.59; 33.91]      | 450.87   | 96.50              | < 0.0001              | 0.2012             |                             |
| 2016/17                  | 16          | 1686             | 6330      | 28.52 [20.61; 38.02]      | 556      | 97.30              | < 0.0001              | 0.4548             |                             |
| 2017/18                  | 18          | 2150             | 9574      | 32.47 [23.22; 43.33]      | 975.65   | 98.30              | < 0.0001              | 0.0953             |                             |
| 2018/19                  | 26          | 4259             | 17522     | 32.06 [25.38; 39.56]      | 1050.15  | 97.60              | < 0.0001              | 0.0273             |                             |
| 2019/20                  | 28          | 4129             | 21267     | 30.57 [21.84; 40.95]      | 2381.7   | 98.90              | < 0.0001              | 0.1051             |                             |
| 2020/21                  | 31          | 1610             | 16828     | 3.82 [1.53; 9.22]         | 1767.6   | 98.30              | < 0.0001              | 0.2778             |                             |
| 2021/22                  | 24          | 5430             | 20994     | 44.29 [32.61; 56.63]      | 2586.72  | 99.10              | < 0.0001              | 0.0012             |                             |
| <b>WHO Region</b>        |             |                  |           |                           |          |                    |                       |                    | 0.0204                      |
| African                  | 6           | 811              | 3485      | 19.13 [13.52; 26.35]      | 223.84   | 96.40              | < 0.0001              | 0.2012             |                             |
| Americas                 | 9           | 1409             | 4832      | 6.45 [0.56; 45.74]        | 78.1     | 89.80              | < 0.0001              | 0.4548             |                             |
| Eastern Mediterranean    | 3           | 151              | 568       | 26.53 [15.66; 41.25]      | 33.53    | 94.00              | < 0.0001              | 0.1051             |                             |
| European                 | 42          | 11125            | 45638     | 31.46 [24.26; 39.68]      | 5534.17  | 98.40              | < 0.0001              | 0.0086             |                             |
| South-East Asia          | 7           | 1263             | 5840      | 26.25 [14.52; 42.72]      | 747.12   | 98.80              | < 0.0001              | 0.5942             |                             |
| Western Pacific          | 18          | 7764             | 42794     | 17.88 [14.24; 22.22]      | 2852.47  | 98.60              | < 0.0001              | 0.962              |                             |
| <b>Age</b>               |             |                  |           |                           |          |                    |                       |                    | < 0.0001                    |
| < 2 years                | 28          | 5974             | 15299     | 46.55 [37.88; 55.43]      | 1829.49  | 96.90              | < 0.0001              | 0.0004             |                             |
| < 5 years                | 18          | 4044             | 16685     | 26.90 [21.99; 32.46]      | 1411.69  | 98.40              | < 0.0001              | 0.7802             |                             |
| < 10 years               | 2           | 609              | 1845      | 23.89 [14.51; 36.74]      | 79.58    | 91.20              | < 0.0001              | NA                 |                             |
| < 15 years               | 15          | 4160             | 21637     | 18.03 [12.65; 25.04]      | 2178.11  | 98.80              | < 0.0001              | 0.2582             |                             |
| < 18 years               | 21          | 7687             | 47628     | 10.44 [6.77; 15.76]       | 2478.92  | 98.30              | < 0.0001              | 0.1767             |                             |
| Not reported             | 1           | 49               | 63        | 77.78 [65.90; 86.37]      | 0        | NA                 | NA                    | NA                 |                             |
| <b>Design</b>            |             |                  |           |                           |          |                    |                       |                    | 0.3220                      |

|                                  |    |       |       |                      |         |       |          |        |        |
|----------------------------------|----|-------|-------|----------------------|---------|-------|----------|--------|--------|
| Cross-sectional                  | 54 | 15523 | 82059 | 23 [19.00; 28.19]    | 7535.17 | 98.50 | < 0.0001 | 0.0213 | 0.3410 |
| Longitudinal                     | 31 | 7000  | 21098 | 29 [19.31; 41.33]    | 1328.51 | 96.60 | < 0.0001 | 0.6375 |        |
| <b>Timing of data collection</b> |    |       |       |                      |         |       |          |        |        |
| Ambispective                     | 3  | 1432  | 11690 | 11.57 [3.45; 32.42]  | 623.24  | 98.90 | < 0.0001 | NA     | 0.0516 |
| Prospective                      | 49 | 10318 | 41237 | 25.49 [19.89; 32.03] | 3854.24 | 98.20 | < 0.0001 | 0.6615 |        |
| Retrospective                    | 33 | 10773 | 50230 | 26.32 [20.15; 33.57] | 5223.79 | 98.50 | < 0.0001 | 0.0461 |        |
| <b>Risk of bias</b>              |    |       |       |                      |         |       |          |        | 0.4697 |
| Low risk                         | 52 | 14642 | 66588 | 28.28 [22.64; 34.69] | 7966.97 | 98.70 | < 0.0001 | 0.0415 |        |
| Moderate risk                    | 33 | 7881  | 36569 | 19.59 [14.27; 26.30] | 2433.69 | 97.70 | < 0.0001 | 0.4702 |        |
| <b>Diagnostic technique\$</b>    |    |       |       |                      |         |       |          |        | 0.3386 |
| Multiplex PCR                    | 14 | 2083  | 10831 | 27.32 [14.57; 45.30] | 1756.55 | 98.70 | < 0.0001 | 0.0439 |        |
| Multiplex RT-PCR                 | 18 | 2215  | 7385  | 30.89 [22.03; 41.42] | 828.23  | 97.00 | < 0.0001 | 0.349  |        |
| PCR                              | 16 | 7247  | 32319 | 24.91 [16.89; 35.12] | 3648    | 99.10 | < 0.0001 | 0.8591 |        |
| qPCR                             | 2  | 52    | 140   | 38.93 [21.17; 60.20] | 11.32   | 91.20 | 0.0008   | NA     |        |
| RT-PCR                           | 31 | 9193  | 46668 | 22.15 [16.57; 28.95] | 3348.97 | 98.00 | < 0.0001 | 0.0936 |        |
| RT-qPCR                          | 4  | 1733  | 5814  | 17.82 [ 3.59; 55.79] | 50.62   | 88.10 | < 0.0001 | NA     |        |
| <b>Sample type</b>               |    |       |       |                      |         |       |          |        | 0.3386 |
| Mixed specimens*                 | 5  | 2643  | 13556 | 19.57 [ 8.56; 38.74] | 1156.71 | 99.10 | < 0.0001 | 0.7849 |        |
| Nasal secretions                 | 9  | 1209  | 3493  | 21.39 [ 6.94; 49.83] | 263.44  | 95.80 | < 0.0001 | 0.5521 |        |
| Nasopharyngeal secretions        | 49 | 14192 | 65456 | 27.19 [21.61; 33.60] | 6453.98 | 98.60 | < 0.0001 | 0.0303 |        |
| Nasopharyngeal secretions or BLF | 6  | 803   | 3384  | 21.68 [12.47; 34.97] | 378.02  | 96.80 | < 0.0001 | 0.0862 |        |
| Not reported                     | 5  | 998   | 3167  | 31.87 [ 5.64; 78.54] | 469.54  | 98.50 | < 0.0001 | NA     |        |
| Oropharyngeal secretions         | 5  | 1385  | 7585  | 17.25 [13.26; 22.14] | 379.74  | 96.30 | 0.0004   | 0.3843 |        |
| Sputum                           | 3  | 549   | 2063  | 25.23 [18.38; 33.58] | 44.03   | 95.50 | < 0.0001 | NA     |        |
| Throat secretions                | 3  | 744   | 4453  | 23.95 [ 9.93; 47.36] | 506.84  | 99.00 | < 0.0001 | NA     |        |

\$The indicated diagnostic technique is according to what is referred to by the authors. \*Mixed specimens: Nasopharyngeal secretions and nasal secretions; or Nasal and throat secretions. Abbreviations: WHO, World Health Organization; BLF, Bronchoalveolar lavage fluid; NA, Not applicable.

**Figure S2. Funnel plot of sensitivity analysis of pooled respiratory syncytial virus (RSV) prevalence in children diagnosed with RSV-related lower respiratory tract infection by molecular assays.**

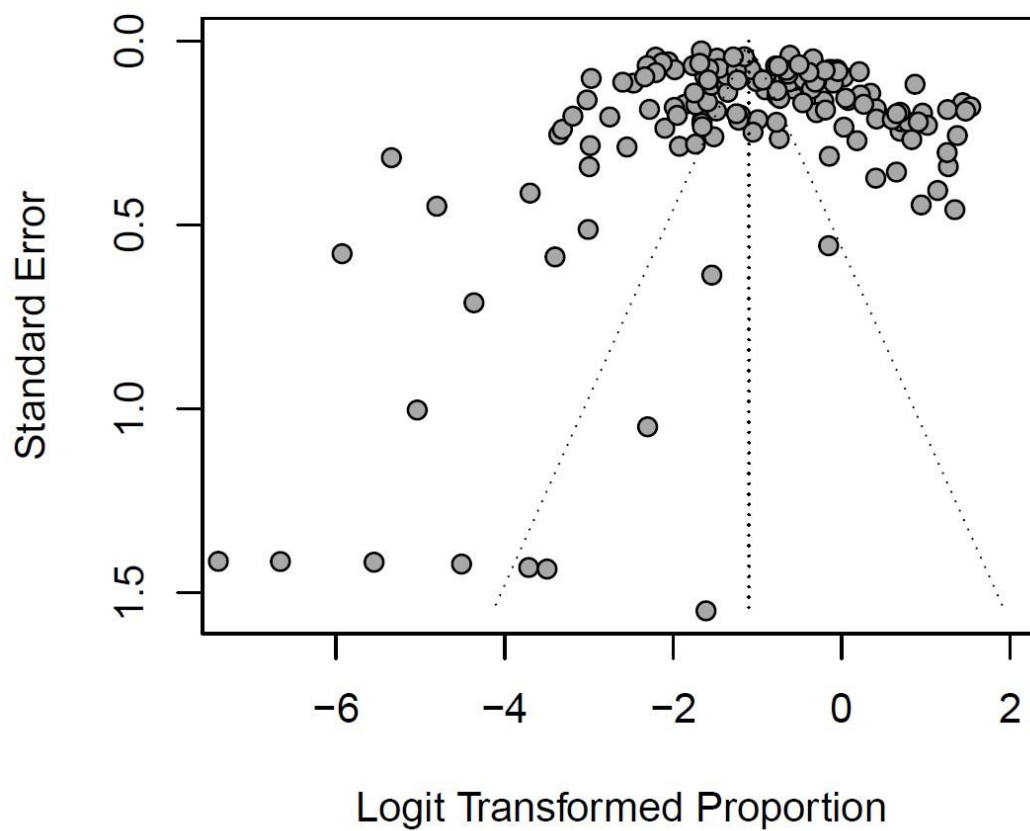

**Table S9. Univariable meta-regression model for the prevalence of the respiratory syncytial virus in hospitalized children with lower respiratory tract infection.**

|                                  | Coefficient [95%-CI]       | P-Value  | R <sup>2</sup> |
|----------------------------------|----------------------------|----------|----------------|
| <b>Period</b>                    |                            |          | 16.47%         |
| Lockdown [2020-2021]             | Reference                  |          |                |
| Pre-pandemic [2015-2020]         | 0.1526 [0.0856, 0.2195]    | < 0.0001 |                |
| Post-lockdown [2021-2022]        | 0.3005 [0.2059, 0.3951]    | < 0.0001 |                |
| <b>Seasons</b>                   |                            |          | 17.03%         |
| 2020/21                          | Reference                  |          |                |
| 2015/16                          | 0.1224 [0.0237; 0.2211]    | 0.0150   |                |
| 2016/17                          | 0.1328 [0.0292; 0.2365]    | 0.0120   |                |
| 2017/18                          | 0.1874 [0.0908; 0.2841]    | 0.0001   |                |
| 2018/19                          | 0.1588 [0.0697; 0.2479]    | 0.0005   |                |
| 2019/20                          | 0.1533 [0.0693; 0.2374]    | 0.0004   |                |
| 2021/22                          | 0.3005 [0.2062; 0.3948]    | < 0.0001 |                |
| <b>WHO Region</b>                |                            |          | 14.39%         |
| Western Pacific                  | Reference                  |          |                |
| African                          | 0.0258 [-0.1070, 0.1586]   | 0.7035   |                |
| Americas                         | 0.1283 [0.0132, 0.2433]    | 0.029    |                |
| Eastern Mediterranean            | 0.0947 [-0.1401, 0.3295]   | 0.429    |                |
| European                         | 0.1780 [0.1188, 0.2373]    | < 0.0001 |                |
| South-East Asia                  | 0.1191 [-0.0088, 0.2469]   | 0.0679   |                |
| <b>Age</b>                       |                            |          | 34.54%         |
| < 2 years                        | Reference                  |          |                |
| < 5 years                        | -0.1883 [-0.2620, -0.1145] | < 0.0001 |                |
| < 10 years                       | -0.2646 [-0.3669, -0.1623] | < 0.0001 |                |
| < 15 years                       | -0.2398 [-0.3103, -0.1692] | < 0.0001 |                |
| < 18 years                       | -0.3141 [-0.3781, -0.2501] | < 0.0001 |                |
| <b>Age [months]</b>              |                            |          | 22.29%         |
| Months                           | -0.0079 [-0.0105, -0.0054] | < 0.0001 |                |
| <b>Type of assay</b>             |                            |          | 7.68%          |
| Immune assays¥                   | Reference                  |          |                |
| Molecular assays¥¥               | 0.1365 [0.0669, 0.2060]    | 0.0001   |                |
| Mixed assays¥¥¥                  | 0.0175 [-0.1020, 0.1369]   | 0.7745   |                |
| <b>Diagnostic technique\$</b>    |                            |          | 9.72%          |
| Direct immunofluorescence        | Reference                  |          |                |
| Antigen testing                  | 0.0591 [-0.0723, 0.1905]   | 0.3783   |                |
| Mixed assays¥¥¥                  | 0.0357 [-0.0892, 0.1606]   | 0.575    |                |
| Multiplex PCR                    | 0.2053 [0.0925, 0.3181]    | 0.0004   |                |
| Multiplex RT-PCR                 | 0.1880 [0.0795, 0.2966]    | 0.0007   |                |
| PCR                              | 0.1551 [0.0546, 0.2555]    | 0.0025   |                |
| qPCR                             | 0.2366 [-0.0692, 0.5423]   | 0.1294   |                |
| RT-PCR                           | 0.1230 [0.0344, 0.2116]    | 0.0065   |                |
| RT-qPCR                          | 0.1441 [-0.0260, 0.3141]   | 0.0968   |                |
| <b>Sample type</b>               |                            |          | 9.08%          |
| Nasopharyngeal secretions        | Reference                  |          |                |
| Mixed specimens*                 | -0.0493 [-0.1583, 0.0597]  | 0.3753   |                |
| Nasal secretions                 | 0.0261 [-0.0948, 0.1470]   | 0.6723   |                |
| Nasopharyngeal secretions or BLF | -0.1574 [-0.2423, -0.0725] | 0.0003   |                |
| Oropharyngeal secretions         | -0.1516 [-0.2499, -0.0534] | 0.0025   |                |
| Sputum                           | -0.0642 [-0.2956, 0.1673]  | 0.587    |                |
| Throat secretions                | -0.0924 [-0.2315, 0.0467]  | 0.1931   |                |
| <b>Design</b>                    |                            |          | 3.94%          |

|                                  |                           |        |       |
|----------------------------------|---------------------------|--------|-------|
| Cross-sectional                  | Reference                 |        |       |
| Longitudinal                     | 0.0962 [0.0314, 0.1609]   | 0.0036 |       |
| <b>Timing of data collection</b> |                           |        | 0.30% |
| Prospective                      | Reference                 |        |       |
| Ambispective                     | -0.0419 [-0.1936, 0.1099] | 0.5888 |       |
| Retrospective                    | -0.0197 [-0.0801, 0.0407] | 0.522  |       |
| <b>Risk of bias</b>              |                           |        | 1.58% |
| Low risk                         | Reference                 |        |       |
| Moderate risk                    | -0.0554 [-0.1157, 0.0049] | 0.0716 |       |

¥Immune assays: Antigen testing; or Direct immunofluorescence. ¥¥Molecular assays: Multiplex PCR; or Multiplex RT-PCR; or PCR; or qPCR; or RT-PCR; or RT-qPCR. ¥¥¥Mixed assays: Antigen testing/RT-PCR; or Direct immunofluorescence/RT-qPCR/antigen testing; or Direct immunofluorescence/RT-PCR; or Indirect immunofluorescence/PCR. \$The indicated diagnostic technique is according to what is referred to by the authors. \*Mixed specimens: Nasopharyngeal secretions and nasal secretions; or Nasal and throat secretions. Abbreviations: WHO, World Health Organization; BLF, Bronchoalveolar lavage fluid.



**Figure S3. Bubble plot illustrating the association between average age in months and prevalence of respiratory syncytial virus.**

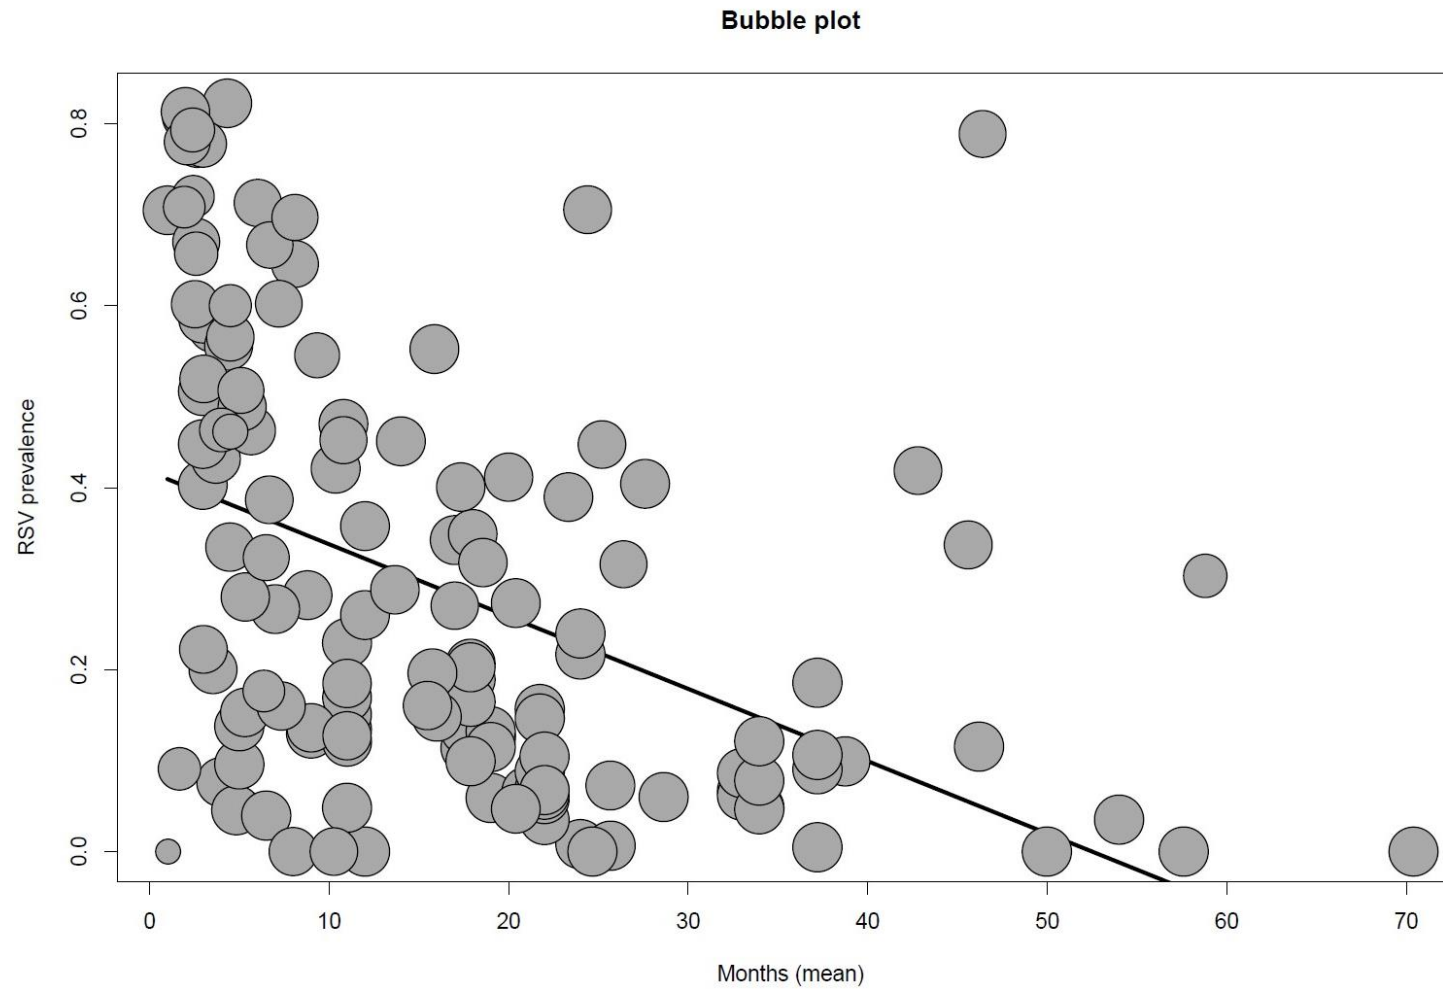

Abbreviations: RSV, respiratory syncytial virus.

**Table S10. The AMSTAR 2 (A Measurement Tool to Assess Systematic Reviews) instrument.**

| AMSTAR 2                                                                                                                                                                                                                                                                                                                                                                                                                                                                          |                                                                                                                                                                                                                                                                                                                                                                                                                                                                                  |                                                                                                                    |
|-----------------------------------------------------------------------------------------------------------------------------------------------------------------------------------------------------------------------------------------------------------------------------------------------------------------------------------------------------------------------------------------------------------------------------------------------------------------------------------|----------------------------------------------------------------------------------------------------------------------------------------------------------------------------------------------------------------------------------------------------------------------------------------------------------------------------------------------------------------------------------------------------------------------------------------------------------------------------------|--------------------------------------------------------------------------------------------------------------------|
| <p><b>1. Did the research questions and inclusion criteria for the review include the components of PICO?</b></p>                                                                                                                                                                                                                                                                                                                                                                 |                                                                                                                                                                                                                                                                                                                                                                                                                                                                                  |                                                                                                                    |
| <p>For Yes:</p> <p><input type="checkbox"/> Population</p> <p><input type="checkbox"/> Intervention</p> <p><input type="checkbox"/> Comparator group</p> <p><input type="checkbox"/> Outcome</p>                                                                                                                                                                                                                                                                                  | <p>Optional (recommended)</p> <p><input type="checkbox"/> Timeframe for follow-up</p>                                                                                                                                                                                                                                                                                                                                                                                            | <p><input type="checkbox"/> Yes</p> <p><input type="checkbox"/> No</p>                                             |
| <p><b>2. Did the report of the review contain an explicit statement that the review methods were established prior to the conduct of the review and did the report justify any significant deviations from the protocol?</b></p>                                                                                                                                                                                                                                                  |                                                                                                                                                                                                                                                                                                                                                                                                                                                                                  |                                                                                                                    |
| <p>For Partial Yes:</p> <p>The authors state that they had a written protocol or guide that included ALL the following:</p> <p><input type="checkbox"/> review question(s)</p> <p><input type="checkbox"/> a search strategy</p> <p><input type="checkbox"/> inclusion/exclusion criteria</p> <p><input type="checkbox"/> a risk of bias assessment</p>                                                                                                                           | <p>For Yes:</p> <p>As for partial yes, plus the protocol should be registered and should also have specified:</p> <p><input type="checkbox"/> a meta-analysis/synthesis plan, if appropriate, <i>and</i></p> <p><input type="checkbox"/> a plan for investigating causes of heterogeneity</p> <p><input type="checkbox"/> justification for any deviations from the protocol</p>                                                                                                 | <p><input type="checkbox"/> Yes</p> <p><input type="checkbox"/> Partial Yes</p> <p><input type="checkbox"/> No</p> |
| <p><b>3. Did the review authors explain their selection of the study designs for inclusion in the review?</b></p>                                                                                                                                                                                                                                                                                                                                                                 |                                                                                                                                                                                                                                                                                                                                                                                                                                                                                  |                                                                                                                    |
| <p>For Yes, the review should satisfy ONE of the following:</p> <p><input type="checkbox"/> <i>Explanation for</i> including only RCTs</p> <p><input type="checkbox"/> OR <i>Explanation for</i> including only NRSI</p> <p><input type="checkbox"/> OR <i>Explanation for</i> including both RCTs and NRSI</p> <p><input type="checkbox"/> Yes</p> <p><input type="checkbox"/> No</p>                                                                                            |                                                                                                                                                                                                                                                                                                                                                                                                                                                                                  |                                                                                                                    |
| <p><b>4. Did the review authors use a comprehensive literature search strategy?</b></p>                                                                                                                                                                                                                                                                                                                                                                                           |                                                                                                                                                                                                                                                                                                                                                                                                                                                                                  |                                                                                                                    |
| <p>For Partial Yes (all the following):</p> <p><input type="checkbox"/> searched at least 2 databases (relevant to research question)</p> <p><input type="checkbox"/> provided key word and/or search strategy</p> <p><input type="checkbox"/> justified publication restrictions (eg, language)</p>                                                                                                                                                                              | <p>For Yes, should also have (all the following):</p> <p><input type="checkbox"/> searched the reference lists/bibliographies of included studies</p> <p><input type="checkbox"/> searched trial/study registries</p> <p><input type="checkbox"/> included/consulted content experts in the field</p> <p><input type="checkbox"/> where relevant, searched for grey literature</p> <p><input type="checkbox"/> conducted search within 24 months of completion of the review</p> | <p><input type="checkbox"/> Yes</p> <p><input type="checkbox"/> Partial Yes</p> <p><input type="checkbox"/> No</p> |
| <p><b>5. Did the review authors perform study selection in duplicate?</b></p>                                                                                                                                                                                                                                                                                                                                                                                                     |                                                                                                                                                                                                                                                                                                                                                                                                                                                                                  |                                                                                                                    |
| <p>For Yes, either ONE of the following:</p> <p><input type="checkbox"/> at least two reviewers independently agreed on selection of eligible studies and achieved consensus on which studies to include</p> <p><input type="checkbox"/> OR two reviewers selected a sample of eligible studies <u>and</u> achieved good agreement (at least 80 per cent), with the remainder selected by one reviewer</p> <p><input type="checkbox"/> Yes</p> <p><input type="checkbox"/> No</p> |                                                                                                                                                                                                                                                                                                                                                                                                                                                                                  |                                                                                                                    |
| <p><b>6. Did the review authors perform data extraction in duplicate?</b></p>                                                                                                                                                                                                                                                                                                                                                                                                     |                                                                                                                                                                                                                                                                                                                                                                                                                                                                                  |                                                                                                                    |
| <p>For Yes, either ONE of the following:</p> <p><input type="checkbox"/> at least two reviewers achieved consensus on which data to extract</p> <p><input type="checkbox"/> Yes</p>                                                                                                                                                                                                                                                                                               |                                                                                                                                                                                                                                                                                                                                                                                                                                                                                  |                                                                                                                    |

|                                                                                                                                                                                                                                                                                                                                                           |                                                                                                                                                                                                                                                                                                                                |                                                                                                                                                               |
|-----------------------------------------------------------------------------------------------------------------------------------------------------------------------------------------------------------------------------------------------------------------------------------------------------------------------------------------------------------|--------------------------------------------------------------------------------------------------------------------------------------------------------------------------------------------------------------------------------------------------------------------------------------------------------------------------------|---------------------------------------------------------------------------------------------------------------------------------------------------------------|
| from included studies<br><input type="checkbox"/> OR two reviewers extracted data from a sample of eligible studies <u>and</u> achieved good agreement (at least 80 per cent), with the remainder extracted by one reviewer                                                                                                                               | <input type="checkbox"/> No                                                                                                                                                                                                                                                                                                    |                                                                                                                                                               |
| <b>7. Did the review authors provide a list of excluded studies and justify the exclusions?</b>                                                                                                                                                                                                                                                           |                                                                                                                                                                                                                                                                                                                                |                                                                                                                                                               |
| For Partial Yes:<br><input type="checkbox"/> provided a list of all potentially relevant studies that were read in full text form but excluded from the review                                                                                                                                                                                            | For Yes, must also have:<br><input checked="" type="checkbox"/> Justified the exclusion from the review of each potentially relevant study                                                                                                                                                                                     | <input checked="" type="checkbox"/> Yes<br><input type="checkbox"/> Partial Yes<br><input type="checkbox"/> No                                                |
| <b>8. Did the review authors describe the included studies in adequate detail?</b>                                                                                                                                                                                                                                                                        |                                                                                                                                                                                                                                                                                                                                |                                                                                                                                                               |
| For Partial Yes (ALL the following):<br><input checked="" type="checkbox"/> described populations<br><input checked="" type="checkbox"/> described interventions<br><input checked="" type="checkbox"/> described comparators<br><input checked="" type="checkbox"/> described outcomes<br><input checked="" type="checkbox"/> described research designs | For Yes, should also have ALL the following:<br><input type="checkbox"/> described population in detail<br><input type="checkbox"/> described intervention and comparator in detail (including doses where relevant)<br><input type="checkbox"/> described study's setting<br><input type="checkbox"/> timeframe for follow-up | <input type="checkbox"/> Yes<br><input checked="" type="checkbox"/> Partial Yes<br><input type="checkbox"/> No                                                |
| <b>9. Did the review authors use a satisfactory technique for assessing the risk of bias (RoB) in individual studies that were included in the review?</b>                                                                                                                                                                                                |                                                                                                                                                                                                                                                                                                                                |                                                                                                                                                               |
| <b>RCTs</b>                                                                                                                                                                                                                                                                                                                                               |                                                                                                                                                                                                                                                                                                                                |                                                                                                                                                               |
| For Partial Yes, must have assessed RoB from:<br><input type="checkbox"/> unconcealed allocation, <i>and</i><br><input type="checkbox"/> lack of blinding of patients and assessors when assessing outcomes (unnecessary for objective outcomes such as all cause mortality)                                                                              | For Yes, must also have assessed RoB from:<br><input type="checkbox"/> allocation sequence that was not truly random, <i>and</i><br><input type="checkbox"/> selection of the reported result from among multiple measurements or analyses of a specified outcome                                                              | <input type="checkbox"/> Yes<br><input type="checkbox"/> Partial Yes<br><input type="checkbox"/> No<br><input type="checkbox"/> Includes only NRSI            |
| <b>NRSI</b>                                                                                                                                                                                                                                                                                                                                               |                                                                                                                                                                                                                                                                                                                                |                                                                                                                                                               |
| For Partial Yes, must have assessed RoB:<br><input checked="" type="checkbox"/> from confounding, <i>and</i><br><input checked="" type="checkbox"/> from selection bias                                                                                                                                                                                   | For Yes, must also have assessed RoB:<br><input type="checkbox"/> methods used to ascertain exposures and outcomes, <i>and</i><br><input type="checkbox"/> selection of the reported result from among multiple measurements or analyses of a specified outcome                                                                | <input type="checkbox"/> Yes<br><input checked="" type="checkbox"/> Partial Yes<br><input type="checkbox"/> No<br><input type="checkbox"/> Includes only RCTs |
| <b>10. Did the review authors report on the sources of funding for the studies included in the review?</b>                                                                                                                                                                                                                                                |                                                                                                                                                                                                                                                                                                                                |                                                                                                                                                               |
| For Yes                                                                                                                                                                                                                                                                                                                                                   |                                                                                                                                                                                                                                                                                                                                |                                                                                                                                                               |
| <input type="checkbox"/> Must have reported on the sources of funding for individual studies included in the review. Note: Reporting that the reviewers looked for this information but it was not reported by study authors also qualifies                                                                                                               | <input type="checkbox"/> Yes<br><input checked="" type="checkbox"/> No                                                                                                                                                                                                                                                         |                                                                                                                                                               |
| <b>11. If meta-analysis was performed did the review authors use appropriate methods for statistical combination of results?</b>                                                                                                                                                                                                                          |                                                                                                                                                                                                                                                                                                                                |                                                                                                                                                               |
| <b>RCTs</b>                                                                                                                                                                                                                                                                                                                                               |                                                                                                                                                                                                                                                                                                                                |                                                                                                                                                               |
| For Yes:                                                                                                                                                                                                                                                                                                                                                  |                                                                                                                                                                                                                                                                                                                                |                                                                                                                                                               |
| <input type="checkbox"/> The authors justified combining the data in a meta-analysis<br><input type="checkbox"/> AND they used an appropriate weighted technique to combine study results and adjusted for heterogeneity if present                                                                                                                       | <input type="checkbox"/> Yes<br><input type="checkbox"/> No<br><input type="checkbox"/> No meta-analysis                                                                                                                                                                                                                       |                                                                                                                                                               |

|                                                                                                                                                                                                                                                                                                                                                                                                                                                                                                                                                                                                                                       |                                                                                                                               |
|---------------------------------------------------------------------------------------------------------------------------------------------------------------------------------------------------------------------------------------------------------------------------------------------------------------------------------------------------------------------------------------------------------------------------------------------------------------------------------------------------------------------------------------------------------------------------------------------------------------------------------------|-------------------------------------------------------------------------------------------------------------------------------|
| <input type="checkbox"/> AND investigated the causes of any heterogeneity                                                                                                                                                                                                                                                                                                                                                                                                                                                                                                                                                             | conducted                                                                                                                     |
| <b>For NRSI</b><br>For Yes:                                                                                                                                                                                                                                                                                                                                                                                                                                                                                                                                                                                                           |                                                                                                                               |
| <input checked="" type="checkbox"/> The authors justified combining the data in a meta-analysis<br><input type="checkbox"/> AND they used an appropriate weighted technique to combine study results, adjusting for heterogeneity if present<br><input type="checkbox"/> AND they statistically combined effect estimates from NRSI that were adjusted for confounding, rather than combining raw data, or justified combining raw data when adjusted effect estimates were not available<br><input type="checkbox"/> AND they reported separate summary estimates for RCTs and NRSI separately when both were included in the review | <input checked="" type="checkbox"/> Yes<br><input type="checkbox"/> No<br><input type="checkbox"/> No meta-analysis conducted |
| <b>12. If meta-analysis was performed, did the review authors assess the potential impact of RoB in individual studies on the results of the meta-analysis or other evidence synthesis?</b>                                                                                                                                                                                                                                                                                                                                                                                                                                           |                                                                                                                               |
| For Yes:                                                                                                                                                                                                                                                                                                                                                                                                                                                                                                                                                                                                                              |                                                                                                                               |
| <input type="checkbox"/> included only low risk of bias RCTs<br><input checked="" type="checkbox"/> OR, if the pooled estimate was based on RCTs and/or NRSI at variable RoB, the authors performed analyses to investigate possible impact of RoB on summary estimates of effect                                                                                                                                                                                                                                                                                                                                                     | <input checked="" type="checkbox"/> Yes<br><input type="checkbox"/> No<br><input type="checkbox"/> No meta-analysis conducted |
| <b>13. Did the review authors account for RoB in individual studies when interpreting/discussing the results of the review?</b>                                                                                                                                                                                                                                                                                                                                                                                                                                                                                                       |                                                                                                                               |
| For Yes:                                                                                                                                                                                                                                                                                                                                                                                                                                                                                                                                                                                                                              |                                                                                                                               |
| <input type="checkbox"/> included only low risk of bias RCTs<br><input checked="" type="checkbox"/> OR, if RCTs with moderate or high RoB, or NRSI were included the review provided a discussion of the likely impact of RoB on the results                                                                                                                                                                                                                                                                                                                                                                                          | <input checked="" type="checkbox"/> Yes<br><input type="checkbox"/> No                                                        |
| <b>14. Did the review authors provide a satisfactory explanation for, and discussion of, any heterogeneity observed in the results of the review?</b>                                                                                                                                                                                                                                                                                                                                                                                                                                                                                 |                                                                                                                               |
| For Yes:                                                                                                                                                                                                                                                                                                                                                                                                                                                                                                                                                                                                                              |                                                                                                                               |
| <input type="checkbox"/> There was no significant heterogeneity in the results<br><input checked="" type="checkbox"/> OR if heterogeneity was present the authors performed an investigation of sources of any heterogeneity in the results and discussed the impact of this on the results of the review                                                                                                                                                                                                                                                                                                                             | <input checked="" type="checkbox"/> Yes<br><input type="checkbox"/> No                                                        |
| <b>15. If they performed quantitative synthesis did the review authors carry out an adequate investigation of publication bias (small study bias) and discuss its likely impact on the results of the review?</b>                                                                                                                                                                                                                                                                                                                                                                                                                     |                                                                                                                               |
| For Yes:                                                                                                                                                                                                                                                                                                                                                                                                                                                                                                                                                                                                                              |                                                                                                                               |
| <input checked="" type="checkbox"/> performed graphical or statistical tests for publication bias and discussed the likelihood and magnitude of impact of publication bias                                                                                                                                                                                                                                                                                                                                                                                                                                                            | <input checked="" type="checkbox"/> Yes<br><input type="checkbox"/> No<br><input type="checkbox"/> No meta-analysis conducted |
| <b>16. Did the review authors report any potential sources of conflict of interest, including any funding they received for conducting the review?</b>                                                                                                                                                                                                                                                                                                                                                                                                                                                                                |                                                                                                                               |
| For Yes:                                                                                                                                                                                                                                                                                                                                                                                                                                                                                                                                                                                                                              |                                                                                                                               |
| <input type="checkbox"/> The authors reported no competing interests OR<br><input checked="" type="checkbox"/> The authors described their funding sources and how they managed potential conflicts of interest                                                                                                                                                                                                                                                                                                                                                                                                                       | <input checked="" type="checkbox"/> Yes<br><input type="checkbox"/> No                                                        |

**Figure S4. Prevalence of intensive care unit (ICU) admissions in hospitalized children with lower respiratory tract infections related to respiratory syncytial virus (RSV).**

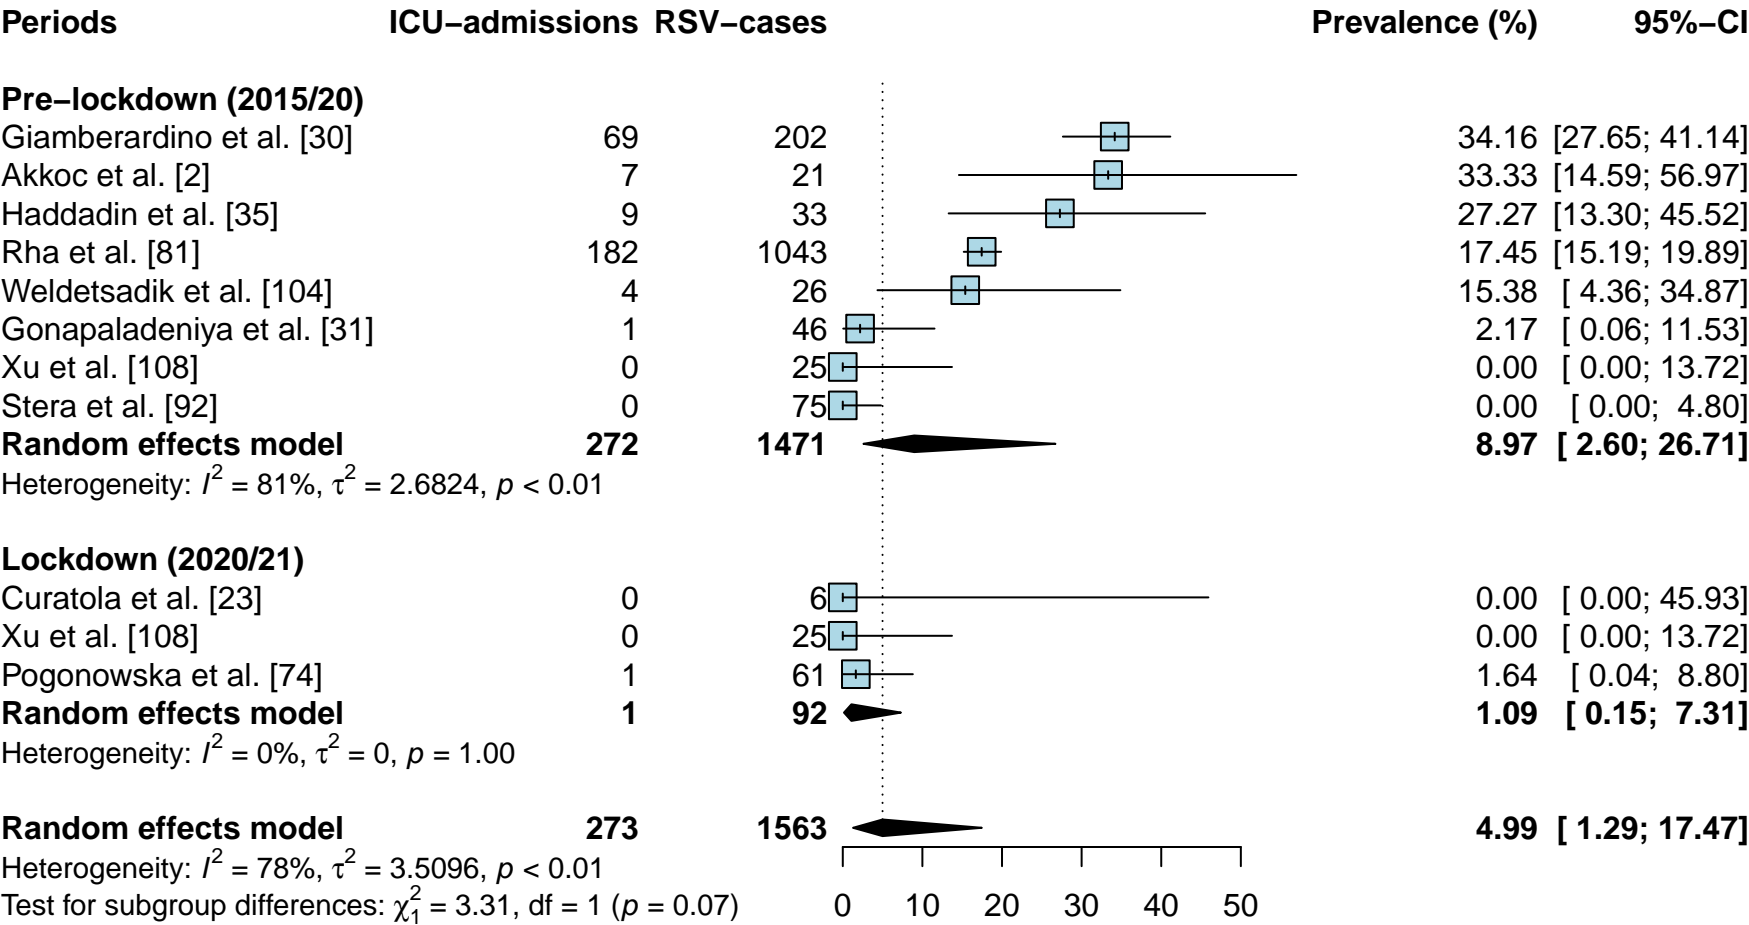

**Figure S5. Mortality among hospitalized children with lower respiratory tract infections related to respiratory syncytial virus (RSV).**

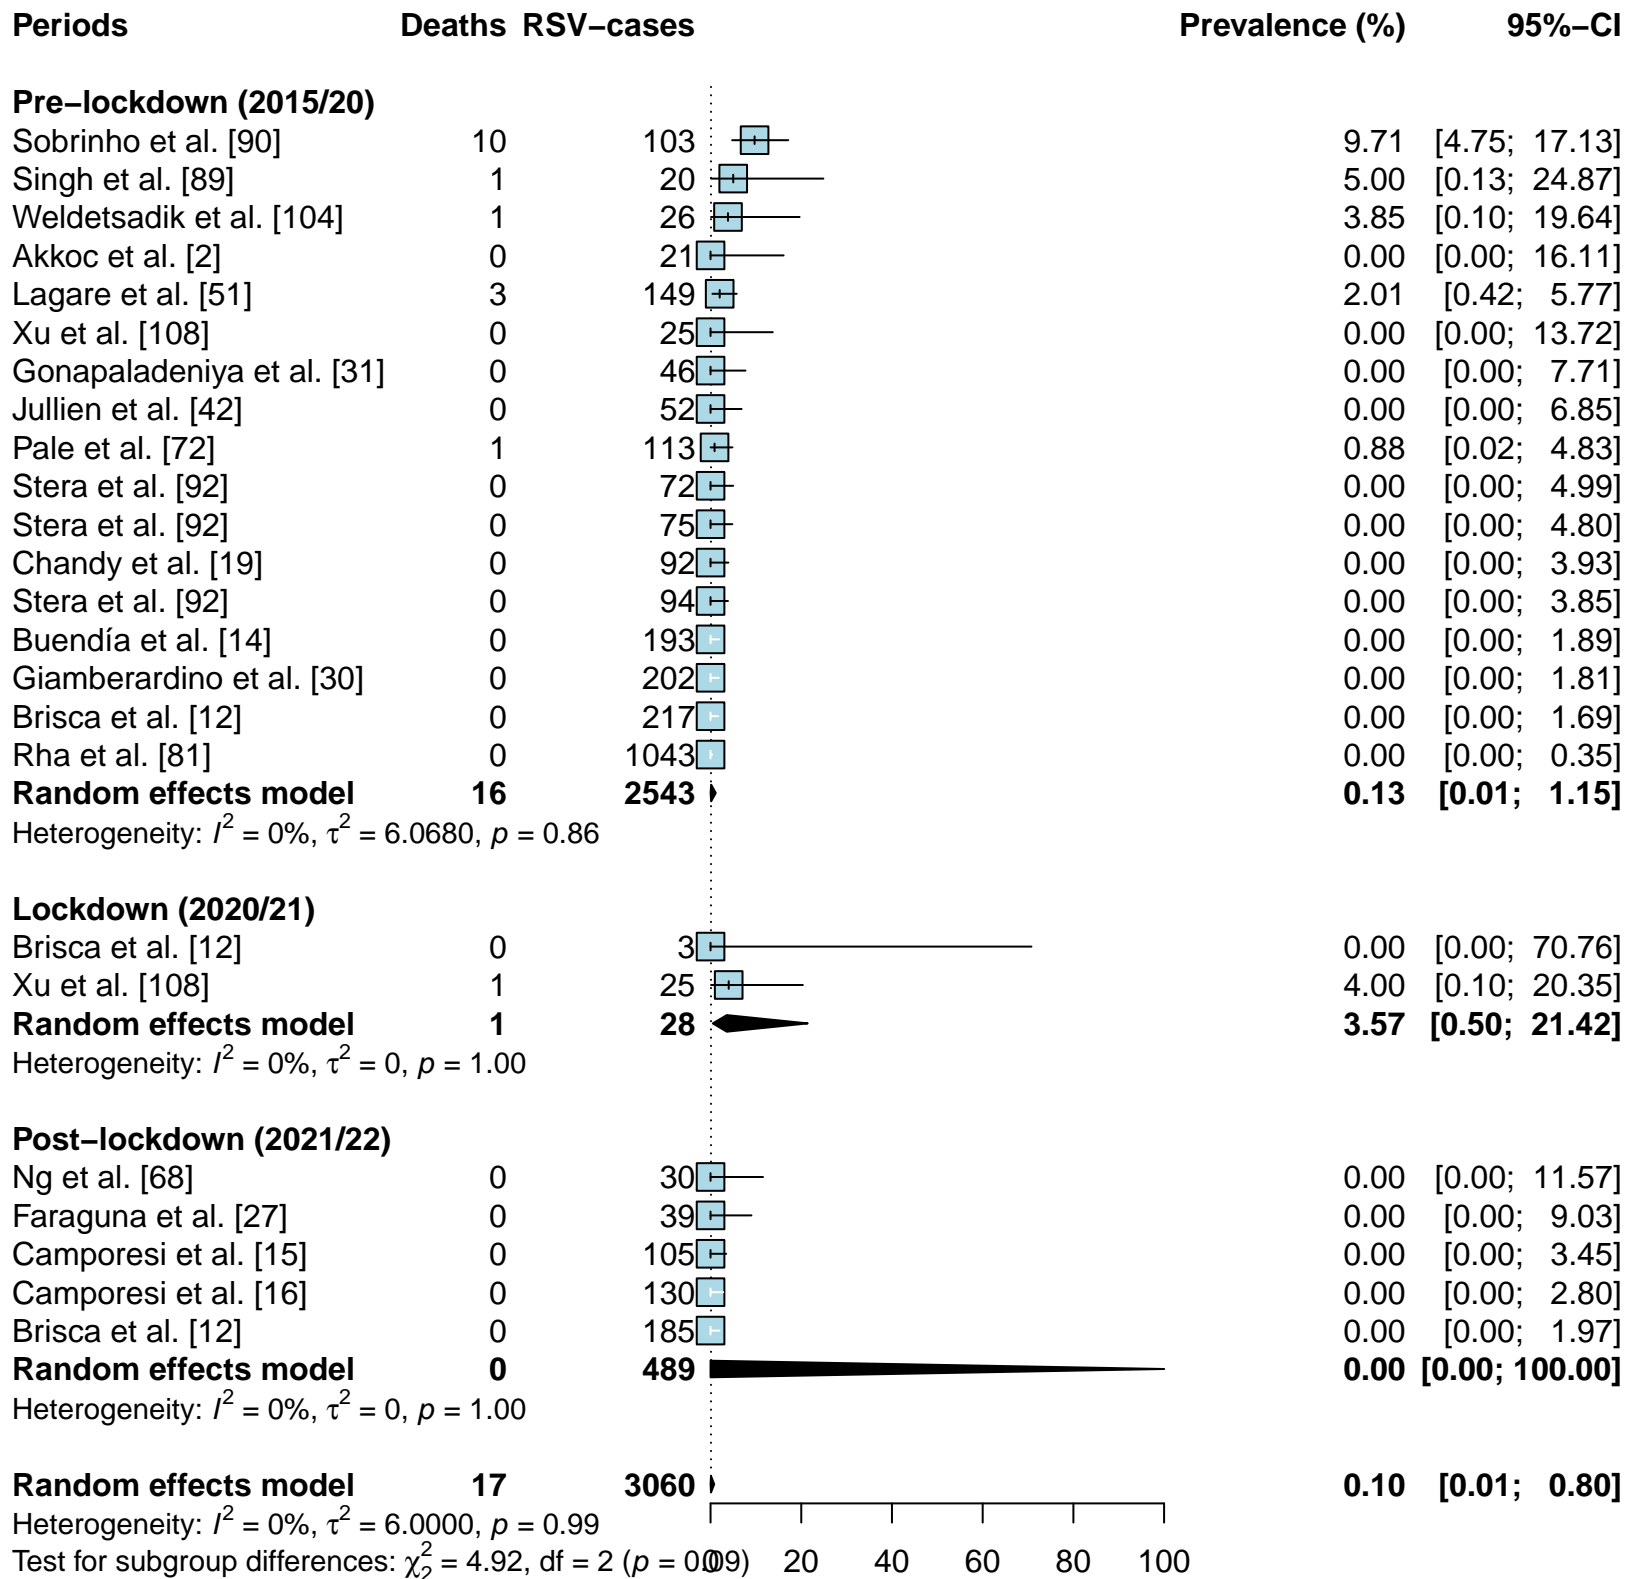

## References:

1. Agca H, Akalin H, Saglik I, Hacimustafaoglu M, Celebi S, Ener B. Changing epidemiology of influenza and other respiratory viruses in the first year of COVID-19 pandemic. *J Infect Public Health*. 2021 Sep;14(9):1186-1190. doi: 10.1016/j.jiph.2021.08.004. Epub 2021 Aug 8. PMID: 34399190.
2. Akkoc G, Dogan C, Bayraktar S, Sahin K, Elevli M. Evaluation of viral respiratory pathogens in children aged under five hospitalized with lower respiratory tract infections. *North Clin Istanbul*. 2022 Apr 14;9(2):162-172. doi: 10.14744/nci.2021.69923. PMID: 35582505; PMCID: PMC9039642.
3. Al-Zayadneh E, Mohammad Abu Assab D, Adeeb Arabiat E, Al-Iede M, Ahmad Kayed H, Daher A. The burden of influenza and other respiratory viruses in hospitalized infants and children in a university hospital, Jordan. *Multidiscip Respir Med*. 2021 Nov 11;16(1):763. doi: 10.4081/mrm.2021.763. PMID: 34900252; PMCID: PMC8607186.
4. Assane D, Makhtar C, Abdoulaye D, Amary F, Djibril B, Amadou D, Niokhor DJB, Amadou D, Cheikh L, Ndongo D, Mbayame N, Lamine F, Bouh BCS. Viral and Bacterial Etiologies of Acute Respiratory Infections Among Children Under 5 Years in Senegal. *Microbiol Insights*. 2018 Feb 13;11:1178636118758651. doi: 10.1177/1178636118758651. PMID: 29467579; PMCID: PMC5815418.
5. Baldassarre ME, Loconsole D, Centrone F, Caselli D, Martire B, Quartulli L, Acquafredda A, D'Amato G, Maffei G, Latorre G, Riganti A, Di Noia M, Chironna M, Laforgia N. Hospitalization for bronchiolitis in children aged  $\leq 1$  year, Southern Italy, year 2021: need for new preventive strategies? *Ital J Pediatr*. 2023 Jun 6;49(1):66. doi: 10.1186/s13052-023-01455-2. PMID: 37280662; PMCID: PMC10243233.
6. Barbati F, Moriondo M, Pisano L, Calistri E, Lodi L, Ricci S, Giovannini M, Canessa C, Indolfi G, Azzari C. Epidemiology of Respiratory Syncytial Virus-Related Hospitalization Over a 5-Year Period in Italy: Evaluation of Seasonality and Age Distribution Before Vaccine

Introduction. *Vaccines (Basel)*. 2020 Jan 4;8(1):15. doi: 10.3390/vaccines8010015. PMID: 31947976; PMCID: PMC7157234.

7. Bedir Demirdağ T, Atay Ünal N, Tapısız A, Kara N, Güdeloğlu E, Tezer H, et al. Distribution and clinical features of viral respiratory infections in children after face-to-face education in 2021-2022 winter period. *J Pediatr Inf*. 2022;16:e1-e5.
8. Ben-Shimol S, Ramilo O, Leber AL, van der Beek BA, Everhart K, Mertz S, Mejias A, Dagan R. A Hypothesis-Generating Prospective Longitudinal Study to Assess the Relative Contribution of Common Respiratory Viruses to Severe Lower Respiratory Infections in Young Children. *Pediatr Infect Dis J*. 2023 May 1;42(5):396-404. doi: 10.1097/INF.0000000000003865. Epub 2023 Mar 8. PMID: 36917029.
9. Berdah L, Romain AS, Rivière S, Schnuriger A, Perrier M, Carbajal R, Lorrot M, Guedj R, Corvol H. Retrospective observational study of the influence of the COVID-19 outbreak on infants' hospitalisation for acute bronchiolitis. *BMJ Open*. 2022 Oct 31;12(10):e059626. doi: 10.1136/bmjopen-2021-059626. PMID: 36316083; PMCID: PMC9627576.
10. Bermúdez Barrezueta L, Gutiérrez Zamorano M, López-Casillas P, Brezmes-Raposo M, Sanz Fernández I, Pino Vázquez MA. Influence of the COVID-19 pandemic on the epidemiology of acute bronchiolitis. *Enferm Infecc Microbiol Clin (Engl Ed)*. 2023 Jun-Jul;41(6):348-351. doi: 10.1016/j.eimce.2022.09.001. Epub 2022 Sep 20. PMID: 36175287; PMCID: PMC9485429.
11. Bhardwaj S, Choudhary ML, Jadhav S, Vipat V, Ghuge R, Salvi S, Kulkarni R, Kinikar A, Padbidri V, Bafna S, Bavdekare A, D'costa P, Gujar N, Potdar V. A retrospective analysis of respiratory virus transmission before and during the COVID-19 pandemic in Pune, the western region of India. *Front Public Health*. 2022 Sep 8;10:936634. doi: 10.3389/fpubh.2022.936634. PMID: 36159243; PMCID: PMC9494283.
12. Brisca G, Mariani M, Buratti S, Ferretti M, Pirlo D, Buffoni I, Mallamaci M, Salvati P, Tagliarini G, Piccotti E, Sacco O, Castagnola E, Moscatelli A. How has the SARS-CoV-2 pandemic changed the epidemiology and management of acute bronchiolitis? *Pediatr*



- Pulmonol.* 2023 Apr;58(4):1169-1177. doi: 10.1002/ppul.26315. Epub 2023 Jan 20. PMID: 36636959.
13. Buendia JA, Guerrero Patino D. Importance of respiratory syncytial virus as a predictor of hospital length of stay in bronchiolitis. *F1000Res.* 2021 Feb 15;10:110. doi: 10.12688/f1000research.40670.3. PMID: 35903216.
  14. Buendía JA, Polack FP, Patiño DG. Clinical Manifestations and Outcomes of Respiratory Syncytial Virus Infection in Children Less Than Two Years in Colombia. *Indian Pediatr.* 2021 Nov 15;58(11):1091-1092. Epub 2020 Aug 19. PMID: 32893827.
  15. Camporesi A, Morello R, Pierucci UM, Proli F, Lazzareschi I, Bersani G, Valentini P, Roland D, Buonsenso D. 2021/22 and 2022/23 Post-Pandemic Bronchiolitis Seasons in Two Major Italian Cities: A Prospective Study. *Children (Basel).* 2023 Jun 20;10(6):1081. doi: 10.3390/children10061081. PMID: 37371312; PMCID: PMC10297298.
  16. Camporesi A, Morello R, Ferro V, Pierantoni L, Rocca A, Lanari M, Trobia GL, Sciacca T, Bellinvia AG, De Ferrari A, Valentini P, Roland D, Buonsenso D. Epidemiology, Microbiology and Severity of Bronchiolitis in the First Post-Lockdown Cold Season in Three Different Geographical Areas in Italy: A Prospective, Observational Study. *Children (Basel).* 2022 Apr 1;9(4):491. doi: 10.3390/children9040491. PMID: 35455535; PMCID: PMC9024462.
  17. Cao R, Du Y, Tong J, Xia D, Song Q, Xia Z, Liu M, Du H, Han J, Gao C. Influence of COVID-19 pandemic on the virus spectrum in children with respiratory infection in Xuzhou, China: a long-term active surveillance study from 2015 to 2021. *BMC Infect Dis.* 2023 Jul 13;23(1):467. doi: 10.1186/s12879-023-08247-3. PMID: 37442963; PMCID: PMC10339539.
  18. Carlone G, Graziano G, Trotta D, Cafagno C, Aricò MO, Campodipietro G, Marabini C, Lizzi M, Fornaro M, Caselli D, Valletta E, Aricò M. Bronchiolitis 2021-2022 epidemic: multicentric analysis of the characteristics and treatment approach in 214 children from different areas in Italy. *Eur J Pediatr.* 2023 Apr;182(4):1921-1927. doi: 10.1007/s00431-023-04853-0. Epub 2023 Feb 20. PMID: 36807514; PMCID: PMC9943040.

19. Chandy S, Manoharan A, Hameed A, Jones LK, Nachiyar GS, Ramya MS, et al. A study on pediatric respiratory tract infections in hospitalised children from Chennai. *Clin Epidemiol Glob Health*. 2022;15:101067.
20. Chu FL, Li C, Chen L, Dong B, Qiu Y, Liu Y. Respiratory viruses among pediatric inpatients with acute lower respiratory tract infections in Jinan, China, 2016-2019. *J Med Virol*. 2022 Sep;94(9):4319-4328. doi: 10.1002/jmv.27875. Epub 2022 May 28. PMID: 35593042.
21. Coma E, Vila J, Méndez-Boo L, Antón A, Mora N, Fina F, Fàbregas M, Medina M. Respiratory Syncytial Virus Infections in Young Children Presenting to Primary Care in Catalonia During the COVID-19 Pandemic. *J Pediatric Infect Dis Soc*. 2022 Feb 23;11(2):69-72. doi: 10.1093/jpids/piab121. PMID: 34922377.
22. Curatola A, Graglia B, Ferretti S, Covino M, Pansini V, Eftimiadi G, Chiaretti A, Gatto A. The acute bronchiolitis rebound in children after COVID-19 restrictions: a retrospective, observational analysis. *Acta Biomed*. 2023 Feb 13;94(1):e2023031. doi: 10.23750/abm.v94i1.13552. PMID: 36786263; PMCID: PMC9987502.
23. Curatola A, Lazzareschi I, Bersani G, Covino M, Gatto A, Chiaretti A. Impact of COVID-19 outbreak in acute bronchiolitis: Lesson from a tertiary Italian Emergency Department. *Pediatr Pulmonol*. 2021 Aug;56(8):2484-2488. doi: 10.1002/ppul.25442. Epub 2021 May 7. PMID: 33961732; PMCID: PMC8242382.
24. De Rose DU, Caoci S, Auriti C, Maddaloni C, Capolupo I, Salvatori G, Brusco C, Coltella L, Concato C, Russo C, Colagrossi L, Perno CF, Braguglia A, Villani A, Dotta A, Raponi M. Lessons from SARS-CoV-2 Pandemics: How Restrictive Measures Impacted the Trend of Respiratory Infections in Neonates and Infants up to Three Months of Age. *Pathogens*. 2022 Sep 23;11(10):1086. doi: 10.3390/pathogens11101086. PMID: 36297143; PMCID: PMC9611509.
25. Diesner-Treiber SC, Voithl P, Voithl JJM, Langer K, Kuzio U, Riepl A, Patel P, Mühl-Riegler A, Mühl B. Respiratory Infections in Children During a Covid-19 Pandemic Winter. *Front Pediatr*.

- 2021 Oct 18;9:740785. doi: 10.3389/fped.2021.740785. PMID: 34733808; PMCID: PMC8558488.
26. Esen AB, Erol M, Kafadar D, Gayret OB, Yigit O, Dilek TD, et al. Progression of Disease and Viral Agents in Infants Hospitalized for Lower Respiratory Tract Infections. *J Pediatr Res*. 2019 Dec;6(4):314-321.
  27. Faraguna MC, Lepri I, Clavenna A, Bonati M, Vimercati C, Sala D, Cattoni A, Melzi ML, Biondi A. The bronchiolitis epidemic in 2021-2022 during the SARS-CoV-2 pandemic: experience of a third level centre in Northern Italy. *Ital J Pediatr*. 2023 Feb 21;49(1):26. doi: 10.1186/s13052-023-01425-8. PMID: 36803828; PMCID: PMC9942300.
  28. Feng Z, Xu B, Zhong L, Chen J, Deng J, Luo Z, Cao L, Tang Y, Li C, Jin R, Deng L, Shang Y, Wu Y, Zhao H, Feng Q, Chen X, Xu L, Xie Z. A multicentre study on the incidence of respiratory viruses in children with community-acquired pneumonia requiring hospitalization in the setting of the zero-COVID policy in China. *Arch Virol*. 2023 Jan 13;168(2):64. doi: 10.1007/s00705-023-05698-6. PMID: 36639581; PMCID: PMC9839207.
  29. Foley DA, Phuong LK, Peplinski J, Lim SM, Lee WH, Farhat A, Minney-Smith CA, Martin AC, Mace AO, Sikazwe CT, Le H, Levy A, Hoepfner T, Borland ML, Hazelton B, Moore HC, Blyth C, Yeoh DK, Bowen AC. Examining the interseasonal resurgence of respiratory syncytial virus in Western Australia. *Arch Dis Child*. 2022 Mar;107(3):e7. doi: 10.1136/archdischild-2021-322507. Epub 2021 Aug 25. PMID: 34433552.
  30. I G Giamberardino H, O Pacheco AP, Pereira LA, Debur MDC, Genehold G, Raboni SM. Respiratory syncytial virus: host genetic susceptibility and factors associated with disease severity in a cohort of pediatric patients. *J Trop Pediatr*. 2022 Oct 6;68(6):fmac091. doi: 10.1093/tropej/fmac091. PMID: 36323460.
  31. Gonapaladeniya M, Dissanayake T, Liyanage G. Burden of Respiratory Syncytial Virus Associated Severe Pneumonia in Hospitalized Children. *Int J Pediatr*. 2021 Jun 30;2021:8269400. doi: 10.1155/2021/8269400. PMID: 34306103; PMCID: PMC8266452.

32. Grochowska M, Ambrożej D, Wachnik A, Demkow U, Podsiadły E, Feleszko W. The Impact of the COVID-19 Pandemic Lockdown on Pediatric Infections-A Single-Center Retrospective Study. *Microorganisms*. 2022 Jan 14;10(1):178. doi: 10.3390/microorganisms10010178. PMID: 35056625; PMCID: PMC8778921.
33. Guerrero-Del-Cueto F, Ramos-Fernandez JM, Leiva-Gea I, Reina-Moreno E, Ortiz-Ortigosa A, Carazo-Gallego B, Cordon-Martinez AM, Moreno-Perez D, Nuñez-Cuadros E. Bronchiolitis before and after the SARS-CoV-2 pandemic: Twelve years of experience in a Spanish paediatric hospital. *Pediatr Pulmonol*. 2023 Apr;58(4):1201-1209. doi: 10.1002/ppul.26322. Epub 2023 Jan 24. PMID: 36653064.
34. Guitart C, Bobillo-Perez S, Alejandre C, Armero G, Launes C, Cambra FJ, Balaguer M, Jordan I; Hospital Network for R. S. V. surveillance in Catalonia. Bronchiolitis, epidemiological changes during the SARS-CoV-2 pandemic. *BMC Infect Dis*. 2022 Jan 24;22(1):84. doi: 10.1186/s12879-022-07041-x. PMID: 35073855; PMCID: PMC8785150.
35. Haddadin Z, Rankin DA, Lipworth L, Suh M, McHenry R, Blozinski A, George SS, Fernandez KN, Varjabedian R, Spieker AJ, Shepard DS, Halasa NB. Respiratory Virus Surveillance in Infants across Different Clinical Settings. *J Pediatr*. 2021 Jul;234:164-171.e2. doi: 10.1016/j.jpeds.2021.03.036. Epub 2021 Mar 25. PMID: 33774057.
36. Havdal LB, Bøås H, Bekkevold T, Kran AB, Rojahn AE, Størdal K, Debes S, Døllner H, Nordbø SA, Barstad B, Haarr E, Fernández LV, Nakstad B, Inchley C, Flem E. The burden of respiratory syncytial virus in children under 5 years of age in Norway. *J Infect*. 2022 Feb;84(2):205-215. doi: 10.1016/j.jinf.2021.12.008. Epub 2021 Dec 11. Erratum in: *J Infect*. 2023 Apr;86(4):420. PMID: 34906596.
37. Hu XW, Zhou Y, Yi S, Zhang WX, Wang XR, Du J, Lu QB. Epidemiological Characteristics of Respiratory Syncytial Virus Infection Among Hospitalized Children With Acute Respiratory Tract Infections From 2014 to 2022 in a Hospital in Hubei Province, China: Longitudinal

Surveillance Study. *JMIR Public Health Surveill.* 2023 Apr 27;9:e43941. doi: 10.2196/43941. PMID: 36975172; PMCID: PMC10176131.

38. Ippolito G, La Vecchia A, Umbrello G, Di Pietro G, Bono P, Scalia Catenacci S, Pinzani R, Tagliabue C, Bosis S, Agostoni C, Marchisio PG. Disappearance of Seasonal Respiratory Viruses in Children Under Two Years Old During COVID-19 Pandemic: A Monocentric Retrospective Study in Milan, Italy. *Front Pediatr.* 2021 Aug 5;9:721005. doi: 10.3389/fped.2021.721005. Erratum in: *Front Pediatr.* 2022 Aug 23;10:1006948. PMID: 34422733; PMCID: PMC8374241.
39. Jiang ML, Xu YP, Wu H, Zhu RN, Sun Y, Chen DM, Wang F, Zhou YT, Guo Q, Wu A, Qian Y, Zhou HY, Zhao LQ. Changes in endemic patterns of respiratory syncytial virus infection in pediatric patients under the pressure of nonpharmaceutical interventions for COVID-19 in Beijing, China. *J Med Virol.* 2023 Jan;95(1):e28411. doi: 10.1002/jmv.28411. PMID: 36524893; PMCID: PMC9878212.
40. Jiang W, Wu M, Zhou J, Wang Y, Hao C, Ji W, Zhang X, Gu W, Shao X. Etiologic spectrum and occurrence of coinfections in children hospitalized with community-acquired pneumonia. *BMC Infect Dis.* 2017 Dec 20;17(1):787. doi: 10.1186/s12879-017-2891-x. PMID: 29262797; PMCID: PMC5738861.
41. Jiang X, Wang T, Dai G, Sun H, Jiang W, Chen Z, Yan Y. Clinical characteristics and etiology of children with bronchiolitis before and during the COVID-19 pandemic in Suzhou, China. *Front Pediatr.* 2022 Nov 14;10:974769. doi: 10.3389/fped.2022.974769. PMID: 36452360; PMCID: PMC9703066.
42. Jullien S, Pradhan D, Tshering T, Sharma R, Dema K, Garcia-Garcia S, Ribó JL, Muñoz-Almagro C, Bassat Q. Pneumonia in children admitted to the national referral hospital in Bhutan: A prospective cohort study. *Int J Infect Dis.* 2020 Jun;95:74-83. doi: 10.1016/j.ijid.2020.04.017. Epub 2020 Apr 10. PMID: 32283281; PMCID: PMC7195124.

43. Kang M, Sarkar S, Angurana SK, Singh P, Rana M, Bora I, Chetanya R, Singh B, Muralidharan J, Ratho RK. Paradigm shift of respiratory viruses causing lower respiratory tract infection in children during COVID-19 pandemic in India. *J Infect Dev Ctries*. 2023 Jul 27;17(7):961-970. doi: 10.3855/jidc.17727. PMID: 37515805.
44. Kıymet E, Böncüoğlu E, Şahinkaya Ş, Cem E, Çelebi MY, Düzgöl M, Kara AA, Arıkan KÖ, Aydın T, İşgüder R, Yılmaz MM, Ayhan Y, Gülfidan G, Bayram A, Bayram N, Çelik T, Alp YT, Devrim İ. Distribution of spreading viruses during COVID-19 pandemic: Effect of mitigation strategies. *Am J Infect Control*. 2021 Sep;49(9):1142-1145. doi: 10.1016/j.ajic.2021.06.002. Epub 2021 Jun 9. PMID: 34116082; PMCID: PMC8187742.
45. Knudsen PK, Lind A, Klundby I, Dudman S. The incidence of infectious diseases and viruses other than SARS-CoV-2 amongst hospitalised children in Oslo, Norway during the Covid-19 pandemic 2020-2021. *J Clin Virol Plus*. 2022 Feb;2(1):100060. doi: 10.1016/j.jcvp.2021.100060. Epub 2021 Dec 22. PMID: 35262033; PMCID: PMC8692238.
46. Kockuzu E, Bayrakcı B, Kesici S, Cıtaç A, Karapınar B, Emeksiz S, Anıl AB, Kendirli T, Yukselmiş U, Sevetoglu E, Pakso Ş, Kutlu O, Ağın H, Yıldızdas D, Keskin H, Kalkan G, Hasanoglu A, Yazıcı MU, Sık G, Kılınç A, Durak F, Perk O, Talip M, Yener N, Uzuner S. Comprehensive Analysis of Severe Viral Infections of Respiratory Tract admitted to PICUs during the Winter Season in Turkey. *Indian J Crit Care Med*. 2019 Jun;23(6):263-269. doi: 10.5005/jp-journals-10071-23177. PMID: 31435144; PMCID: PMC6698354.
47. Komoyo GF, Yambiyo BM, Manirakiza A, Gody JC, Muller CP, Hübschen JM, Nakoune E, Snoeck CJ. Epidemiology and genetic characterization of respiratory syncytial virus in children with acute respiratory infections: Findings from the influenza sentinel surveillance network in Central African Republic, 2015 to 2018. *Health Sci Rep*. 2021 May 11;4(2):e298. doi: 10.1002/hsr2.298. PMID: 34013070; PMCID: PMC8112815.
48. Korsun N, Angelova S, Trifonova I, Voleva S, Grigorova I, Tzotcheva I, Mileva S, Alexiev I, Perenovska P. Predominance of ON1 and BA9 genotypes of respiratory syncytial virus (RSV)

- in Bulgaria, 2016-2018. *J Med Virol.* 2021 Jun;93(6):3401-3411. doi: 10.1002/jmv.26415. Epub 2020 Oct 30. PMID: 32779756.
49. Kume Y, Hashimoto K, Chishiki M, Norito S, Suwa R, Ono T, Mochizuki I, Mashiyama F, Ishibashi N, Suzuki S, Sakuma H, Takahashi H, Takeda M, Shirato K, Hosoya M. Changes in virus detection in hospitalized children before and after the severe acute respiratory syndrome coronavirus 2 pandemic. *Influenza Other Respir Viruses.* 2022 Sep;16(5):837-841. doi: 10.1111/irv.12995. Epub 2022 Apr 29. PMID: 35488324; PMCID: PMC9343337.
  50. Kurskaya OG, Prokopyeva EA, Sobolev IA, Solomatina MV, Saroyan TA, Dubovitskiy NA, Derko AA, Nokhova AR, Anoshina AV, Leonova NV, Simkina OA, Komissarova TV, Shestopalov AM, Sharshov KA. Changes in the Etiology of Acute Respiratory Infections among Children in Novosibirsk, Russia, between 2019 and 2022: The Impact of the SARS-CoV-2 Virus. *Viruses.* 2023 Apr 9;15(4):934. doi: 10.3390/v15040934. PMID: 37112913; PMCID: PMC10141072.
  51. Lagare A, Ousmane S, Dano ID, Issaka B, Issa I, Mainassara HB, Testa J, Tempia S, Mamadou S. Molecular detection of respiratory pathogens among children aged younger than 5 years hospitalized with febrile acute respiratory infections: A prospective hospital-based observational study in Niamey, Niger. *Health Sci Rep.* 2019 Oct 11;2(11):e137. doi: 10.1002/hsr2.137. PMID: 31768420; PMCID: PMC6869554.
  52. Lamrani Hanchi A, Guennouni M, Ben Houmich T, Echchakery M, Draiss G, Rada N, Younous S, Bouskraoui M, Soraa N. Changes in the Epidemiology of Respiratory Pathogens in Children during the COVID-19 Pandemic. *Pathogens.* 2022 Dec 15;11(12):1542. doi: 10.3390/pathogens11121542. PMID: 36558876; PMCID: PMC9781834.
  53. Li Y, Zhai Y, Lin Y, Lu C, He Z, Wu S, Yang C, Zhou R, Liu W, Chen D. Epidemiology of respiratory syncytial virus in hospitalized children with community-acquired pneumonia in Guangzhou: a 10-year study. *J Thorac Dis.* 2023 Mar 31;15(3):967-976. doi: 10.21037/jtd-22-331. Epub 2023 Feb 16. PMID: 37065548; PMCID: PMC10089879.

54. Li M, Li C, Jian X, Han D, Zhao J, Jiang L. Viral etiology of acute respiratory tract infection among children under 5 years of age in Kunming City, China: a matched case-case-control study. *J Appl Microbiol.* 2023 Jul 4;134(7):lxad138. doi: 10.1093/jambio/lxad138. PMID: 37418247.
55. Li W, Wang Y, Yu B, Tan Q, Zhou J, Hu J, Wu Y, Wang B, Li H. Disease severity of respiratory syncytial virus (RSV) infection correlate to a novel set of five amino acid substitutions in the RSV attachment glycoprotein (G) in China. *Virus Res.* 2020 May;281:197937. doi: 10.1016/j.virusres.2020.197937. Epub 2020 Mar 16. PMID: 32194139.
56. Li F, Zhang Y, Shi P, Cao L, Su L, Zhang Y, Peng K, Lu R, Tan W, Shen J. Epidemiology of Viruses Causing Pediatric Community Acquired Pneumonia in Shanghai During 2010-2020: What Happened Before and After the COVID-19 Outbreak? *Infect Dis Ther.* 2022 Feb;11(1):165-174. doi: 10.1007/s40121-021-00548-x. Epub 2021 Oct 25. PMID: 34694579; PMCID: PMC8542501.
57. Liu P, Xu M, He L, Su L, Wang A, Fu P, Lu L, Wang C, Xu J. Epidemiology of Respiratory Pathogens in Children with Lower Respiratory Tract Infections in Shanghai, China, from 2013 to 2015. *Jpn J Infect Dis.* 2018 Jan 23;71(1):39-44. doi: 10.7883/yoken.JJID.2017.323. Epub 2017 Dec 26. PMID: 29279451.
58. Liu P, Xu M, Cao L, Su L, Lu L, Dong N, Jia R, Zhu X, Xu J. Impact of COVID-19 pandemic on the prevalence of respiratory viruses in children with lower respiratory tract infections in China. *Virol J.* 2021 Aug 3;18(1):159. doi: 10.1186/s12985-021-01627-8. PMID: 34344406; PMCID: PMC8329611.
59. Lucion MF, Del Valle Juárez M, Pejito MN, Orqueda AS, Romero Bollón L, Mistchenko AS, Gentile Á. Impact of COVID-19 on the circulation of respiratory viruses in a children's hospital: an expected absence. *Arch Argent Pediatr.* 2022 Apr;120(2):99-105. English, Spanish. doi: 10.5546/aap.2022.eng.99. Epub 2022 Jan 12. PMID: 35338813.



60. Ma JE, Ma QF, Wang W, Zeng Y, Cui XH, Wang GL, Liu SY, Wang Z, Xiao X, Xia ZN, Zhu HC, Zhu CL. Analysis of Common Respiratory Infected Pathogens in 3100 Children after the Coronavirus Disease 2019 Pandemic. *Curr Med Sci.* 2022 Oct;42(5):1094-1098. doi: 10.1007/s11596-022-2635-z. Epub 2022 Oct 3. PMID: 36184728; PMCID: PMC9527073.
61. Mackenzie GA, Vilane A, Salaudeen R, Hogerwerf L, van den Brink S, Wijsman LA, Overduin P, Janssens TKS, de Silva TI, van der Sande MAB, Kampmann B, Meijer A. Respiratory syncytial, parainfluenza and influenza virus infection in young children with acute lower respiratory infection in rural Gambia. *Sci Rep.* 2019 Nov 29;9(1):17965. doi: 10.1038/s41598-019-54059-4. PMID: 31784567; PMCID: PMC6884537.
62. Maglione M, Pascarella A, Botti C, Ricci G, Morelli F, Camelia F, Micillo A, Calì C, Savoia F, Tipo V, Giannattasio A. Changing Epidemiology of Acute Viral Respiratory Infections in Hospitalized Children: The Post-Lockdown Effect. *Children (Basel).* 2022 Aug 17;9(8):1242. doi: 10.3390/children9081242. PMID: 36010132; PMCID: PMC9406795.
63. Maruo Y, Ishikawa S, Oura K, Shiraishi H, Sato N, Suganuma T, Mikawa M, Sato T. The impact of the coronavirus disease 2019 pandemic on pediatric hospitalization in Kitami, Japan. *Pediatr Int.* 2022 Jan;64(1):e14937. doi: 10.1111/ped.14937. PMID: 34324763; PMCID: PMC8447412.
64. Mira-Iglesias A, Demont C, López-Labrador FX, Mengual-Chuliá B, García-Rubio J, Carballido-Fernández M, Tortajada-Girbés M, Mollar-Maseres J, Schwarz-Chavarri G, Puig-Barberà J, Díez-Domingo J; Valencia Hospital Network for the Study of Influenza and other Respiratory Viruses. Role of age and birth month in infants hospitalized with RSV-confirmed disease in the Valencia Region, Spain. *Influenza Other Respir Viruses.* 2022 Mar;16(2):328-339. doi: 10.1111/irv.12937. Epub 2021 Nov 24. PMID: 34821055; PMCID: PMC8818825.
65. Moreira ALE, da Silva PAN, Assunção LDP, Santos MO, Ito CRM, de Araújo KM, Cunha MO, Rabelo VDC, de Souza PP, Maia SBS, Peixoto FAO, Wastowski IJ, Carneiro LC, Avelino MAG. Profile analysis of emerging respiratory virus in children. *Eur J Clin Microbiol Infect*

- Dis. 2023 Jul;42(7):873-882. doi: 10.1007/s10096-023-04615-8. Epub 2023 May 9. PMID: 37160574; PMCID: PMC10169160.
66. Nenna R, Matera L, Pierangeli A, Oliveto G, Viscido A, Petrarca L, La Regina DP, Mancino E, Di Mattia G, Villani A, Midulla F. First COVID-19 lockdown resulted in most respiratory viruses disappearing among hospitalised children, with the exception of rhinoviruses. *Acta Paediatr.* 2022 Jul;111(7):1399-1403. doi: 10.1111/apa.16326. Epub 2022 Mar 16. PMID: 35266576; PMCID: PMC9111239.
  67. Nenna R, Matera L, Licari A, Manti S, Di Bella G, Pierangeli A, Palamara AT, Nosetti L, Leonardi S, Marseglia GL, Midulla F; ICHRIS Group. An Italian Multicenter Study on the Epidemiology of Respiratory Syncytial Virus During SARS-CoV-2 Pandemic in Hospitalized Children. *Front Pediatr.* 2022 Jul 14;10:930281. doi: 10.3389/fped.2022.930281. PMID: 35911833; PMCID: PMC9329524.
  68. Ng DC, Tan KK, Ting GSS, Ling C, Fadzilah NFB, Tan SF, Subramaniam T, Zailanahuddin NEB, Lim HY, Baharuddin SB, Lee YL, Mohamad Nor A, Khoo EJ. Comparison of Severe Viral Pneumonia Caused by SARS-CoV-2 and Other Respiratory Viruses Among Malaysian Children During the COVID-19 Pandemic. *Front Pediatr.* 2022 Apr 25;10:865099. doi: 10.3389/fped.2022.865099. PMID: 35547549; PMCID: PMC9082799.
  69. Núñez-Samudio V, Landires I. Epidemiology of viral respiratory infections in a pediatric reference hospital in Central Panama. *BMC Infect Dis.* 2021 Jan 9;21(1):43. doi: 10.1186/s12879-020-05720-1. PMID: 33422002; PMCID: PMC7796567.
  70. Nunziata F, Salomone S, Catzola A, Poeta M, Pagano F, Punzi L, Lo Vecchio A, Guarino A, Bruzzese E. Clinical Presentation and Severity of SARS-CoV-2 Infection Compared to Respiratory Syncytial Virus and Other Viral Respiratory Infections in Children Less than Two Years of Age. *Viruses.* 2023 Mar 9;15(3):717. doi: 10.3390/v15030717. PMID: 36992426; PMCID: PMC10055850.

71. Oumei H, Xuefeng W, Jianping L, Kunling S, Rong M, Zhenze C, Li D, Huimin Y, Lining W, Zhaolan L, Xinmin L, Hua X, Zhiyan J, Yanning L, Yan H, Baoqing Z, Xiaochun F, Chunhui H, Yonghong J, Xue Z, Wei W, Zi W. Etiology of community-acquired pneumonia in 1500 hospitalized children. *J Med Virol*. 2018 Mar;90(3):421-428. doi: 10.1002/jmv.24963. Epub 2017 Nov 9. PMID: 28975629; PMCID: PMC7166354.
72. Pale M, Nacoto A, Tivane A, Nguenha N, Machalele L, Gundane F, Muteto D, Chilundo J, Mavale S, Semá-Baltazar C, Pires G, Augusto O, Mussá T, Gudo E. Respiratory syncytial and influenza viruses in children under 2 years old with severe acute respiratory infection (SARI) in Maputo, 2015. *PLoS One*. 2017 Nov 30;12(11):e0186735. doi: 10.1371/journal.pone.0186735. PMID: 29190684; PMCID: PMC5708764.
73. Pierangeli A, Piralla A, Uceda Renteria S, Giacomel G, Lunghi G, Pagani E, Giacobazzi E, Vian E, Biscaro V, Piccirilli G, Lazzarotto T, Menzo S, Ferreri ML, Novazzi F, Petrarca L, Licari A, Ferrari G, Oliveto G, Antonelli G, Binda S, Galli C, Pellegrinelli L, Pariani E, Baldanti F. Multicenter epidemiological investigation and genetic characterization of respiratory syncytial virus and metapneumovirus infections in the pre-pandemic 2018-2019 season in northern and central Italy. *Clin Exp Med*. 2023 Oct;23(6):2725-2737. doi: 10.1007/s10238-022-00973-3. Epub 2022 Dec 15. PMID: 36522554; PMCID: PMC9754777.
74. Pogonowska M, Guzek A, Goscinska A, Rustecka A, Kalicki B. Compensatory epidemic of RSV infections during the COVID-19 pandemic. An analysis of infections in children hospitalised in the Department of Paediatrics, Paediatric Nephrology and Allergology of the Military Medical Institute in Warsaw in 2020-2021. *Pediatr Med Rodz*. 2022;18(1):52-57.
75. Prasad N, Newbern EC, Trenholme AA, Wood T, Thompson MG, Aminisani N, Huang QS, Grant CC. Respiratory syncytial virus hospitalisations among young children: a data linkage study. *Epidemiol Infect*. 2019 Jan;147:e246. doi: 10.1017/S0950268819001377. Erratum in: *Epidemiol Infect*. 2020 Aug 28;148:e179. PMID: 31364578; PMCID: PMC6805750.

76. Prasad N, Trenholme AA, Huang QS, Duque J, Grant CC, Newbern EC. Respiratory Virus-related Emergency Department Visits and Hospitalizations Among Infants in New Zealand. *Pediatr Infect Dis J*. 2020 Aug;39(8):e176-e182. doi: 10.1097/INF.0000000000002681. PMID: 32675757.
77. Presti S, Manti S, Gambilonghi F, Parisi GF, Papale M, Leonardi S. Comparative Analysis of Pediatric Hospitalizations during Two Consecutive Influenza and Respiratory Virus Seasons Post-Pandemic. *Viruses*. 2023 Aug 28;15(9):1825. doi: 10.3390/v15091825. PMID: 37766232; PMCID: PMC10535437.
78. Pruccoli G, Castagno E, Raffaldi I, Denina M, Barisone E, Baroero L, Timeus F, Rabbone I, Monzani A, Terragni GM, Lovera C, Brach Del Prever A, Manzoni P, Barbaglia M, Roasio L, De Franco S, Calitri C, Lupica M, Felici E, Marciano C, Santovito S, Militerno G, Abrigo E, Curtoni A, Quarello P, Bondone C, Garazzino S. The Importance of RSV Epidemiological Surveillance: A Multicenter Observational Study of RSV Infection during the COVID-19 Pandemic. *Viruses*. 2023 Jan 19;15(2):280. doi: 10.3390/v15020280. PMID: 36851494; PMCID: PMC9963567.
79. Qiu W, Zheng C, Huang S, Zhang Y, Chen Z. Epidemiological Trend of RSV Infection Before and During COVID-19 Pandemic: A Three-Year Consecutive Study in China. *Infect Drug Resist*. 2022 Nov 28;15:6829-6837. doi: 10.2147/IDR.S388231. PMID: 36465809; PMCID: PMC9717604.
80. Ramezannia Z, Sadeghi J, Abdoli Oskouie S, Ahangarzadeh Rezaee M, Bannazadeh Baghi H, Azadi A, Ahangar Oskouee M. Evaluation of Human Respiratory Syncytial Virus and Human Parainfluenza Virus Type 3 among Hospitalized Children in Northwest of Iran. *Can J Infect Dis Med Microbiol*. 2021 Sep 22;2021:2270307. doi: 10.1155/2021/2270307. PMID: 34603564; PMCID: PMC8481064.

81. Rha B, Curns AT, Lively JY, Campbell AP, Englund JA, Boom JA, Azimi PH, Weinberg GA, Staat MA, Selvarangan R, Halasa NB, McNeal MM, Klein EJ, Harrison CJ, Williams JV, Szilagyi PG, Singer MN, Sahni LC, Figueroa-Downing D, McDaniel D, Prill MM, Whitaker BL, Stewart LS, Schuster JE, Pahud BA, Weddle G, Avadhanula V, Munoz FM, Piedra PA, Payne DC, Langley G, Gerber SI. Respiratory Syncytial Virus-Associated Hospitalizations Among Young Children: 2015-2016. *Pediatrics*. 2020 Jul;146(1):e20193611. doi: 10.1542/peds.2019-3611. Epub 2020 Jun 16. PMID: 32546583.
82. Roland D, Williams T, Lyttle MD, Marlow R, Hardelid P, Sinha I, Swann O, Maxwell-Hodkinson A, Cunningham S. Features of the transposed seasonality of the 2021 RSV epidemic in the UK and Ireland: analysis of the first 10 000 patients. *Arch Dis Child*. 2022 Nov;107(11):1062-1063. doi: 10.1136/archdischild-2022-324241. Epub 2022 Sep 2. PMID: 36261149.
83. Sachs N, Goldberg L, Levinsky Y, Dizitzer Y, Vardi Y, Krause I, Scheuerman O, Livni G, Bilavsky E, Bilavsky-Yarden H. The Effect of the COVID-19 Pandemic on Pediatric Respiratory Hospitalizations. *Isr Med Assoc J*. 2023 Mar;25(3):171-176. PMID: 36946659.
84. Sarkar S, Ratho RK, Singh M, Singh MP, Singh A, Sharma M. Comparative Analysis of Epidemiology, Clinical Features, and Cytokine Response of Respiratory Syncytial and Human Metapneumovirus Infected Children with Acute Lower Respiratory Infections. *Jpn J Infect Dis*. 2022 Jan 24;75(1):56-62. doi: 10.7883/yoken.JJID.2021.151. Epub 2021 Jun 30. PMID: 34193665.

85. Savaş Şen Z, Vezir E, Ertürk P. The relationship between viruses and clinical findings in hospitalized children diagnosed with acute lower respiratory tract infection. *J Pediatr Inf.* 2022;16(1):e13-e19.
86. Shen Z, Zhang Y, Li H, Du L. Rapid typing diagnosis and clinical analysis of subtypes A and B of human respiratory syncytial virus in children. *Virology*. 2022 Jan 21;19(1):15. doi: 10.1186/s12985-022-01744-y. PMID: 35062975; PMCID: PMC8781464.
87. Shen DP, Vermeulen F, Debeer A, Lagrou K, Smits A. Impact of COVID-19 on viral respiratory infection epidemiology in young children: A single-center analysis. *Front Public Health.* 2022 Sep 20;10:931242. doi: 10.3389/fpubh.2022.931242. PMID: 36203684; PMCID: PMC9530989.
88. Shi T, Huang L. Prevalence of respiratory pathogens and risk of developing pneumonia under non-pharmaceutical interventions in Suzhou, China. *Epidemiol Infect.* 2023 May 2;151:e82. doi: 10.1017/S0950268823000626. PMID: 37127406; PMCID: PMC10226187.
89. Singh C, Angurana SK, Bora I, Jain N, Kaur K, Sarkar S. Clinico demographic profiling of the Respiratory syncytial virus (RSV) infected children admitted in tertiary care hospital in North India. *J Family Med Prim Care.* 2021 May;10(5):1975-1980. doi: 10.4103/jfmpc.jfmpc\_2406\_20. Epub 2021 May 31. PMID: 34195134; PMCID: PMC8208215.
90. Sobrinho FLDV, Aragon DC, Carlotti APCP. Epidemiology and factors associated with the severity of viral acute lower respiratory infection in children hospitalized in Manaus, Amazonas, in 2017-2018: An observational study. *Medicine (Baltimore).* 2021 May 7;100(18):e25799. doi: 10.1097/MD.00000000000025799. PMID: 33950979; PMCID: PMC8104226.

91. Song X, Delaney M, Shah RK, Campos JM, Wessel DL, DeBiasi RL. Common seasonal respiratory viral infections in children before and during the coronavirus disease 2019 (COVID-19) pandemic. *Infect Control Hosp Epidemiol*. 2022 Oct;43(10):1454-1458. doi: 10.1017/ice.2021.430. Epub 2021 Oct 5. PMID: 34607617.
92. Stera G, Pierantoni L, Masetti R, Leardini D, Biagi C, Buonsenso D, Pession A, Lanari M. Impact of SARS-CoV-2 Pandemic on Bronchiolitis Hospitalizations: The Experience of an Italian Tertiary Center. *Children (Basel)*. 2021 Jun 28;8(7):556. doi: 10.3390/children8070556. PMID: 34203542; PMCID: PMC8304517.
93. Tang X, Dai G, Jiang X, Wang T, Sun H, Chen Z, Huang L, Wang M, Zhu C, Yan Y, Jiang W. Clinical Characteristics of Pediatric Respiratory Tract Infection and Respiratory Pathogen Isolation During the Coronavirus Disease 2019 Pandemic. *Front Pediatr*. 2022 Jan 5;9:759213. doi: 10.3389/fped.2021.759213. PMID: 35071128; PMCID: PMC8767000.
94. Thongpan I, Vichaiwattana P, Vongpunsawad S, Poovorawan Y. Upsurge of human rhinovirus infection followed by a delayed seasonal respiratory syncytial virus infection in Thai children during the coronavirus pandemic. *Influenza Other Respir Viruses*. 2021 Nov;15(6):711-720. doi: 10.1111/irv.12893. Epub 2021 Aug 4. PMID: 34350701; PMCID: PMC8542963.
95. Thwaites RS, Coates M, Ito K, Ghazaly M, Feather C, Abdulla F, Tunstall T, Jain P, Cass L, Rapeport G, Hansel TT, Nadel S, Openshaw P. Reduced Nasal Viral Load and IFN Responses in Infants with Respiratory Syncytial Virus Bronchiolitis and Respiratory Failure. *Am J Respir Crit Care Med*. 2018 Oct 15;198(8):1074-1084. doi: 10.1164/rccm.201712-2567OC. PMID: 29688024; PMCID: PMC6221568.

96. Trenholme A, Webb R, Lawrence S, Arrol S, Taylor S, Ameratunga S, Byrnes CA. COVID-19 and Infant Hospitalizations for Seasonal Respiratory Virus Infections, New Zealand, 2020. *Emerg Infect Dis.* 2021 Feb;27(2):641-643. doi: 10.3201/eid2702.204041. Epub 2020 Dec 12. PMID: 33263515; PMCID: PMC7853573.
97. Tsergouli K, Pappa S, Haidopoulou K, Gogou M, Giannopoulos A, Papa A. Respiratory Syncytial Virus in Greece, 2016-2018. *Intervirology.* 2019;62(5-6):210-215. doi: 10.1159/000506049. Epub 2020 Apr 29. PMID: 32348998.
98. Valley-Omar Z, Tempia S, Hellferscee O, Walaza S, Variava E, Dawood H, Kahn K, McMorrow M, Pretorius M, Mtshali S, Mamorobela E, Wolter N, Venter M, von Gottberg A, Cohen C, Treurnicht FK. Human respiratory syncytial virus diversity and epidemiology among patients hospitalized with severe respiratory illness in South Africa, 2012-2015. *Influenza Other Respir Viruses.* 2022 Mar;16(2):222-235. doi: 10.1111/irv.12905. Epub 2021 Sep 16. PMID: 34528769; PMCID: PMC8818822.
99. Varela FH, Sartor ITS, Polese-Bonatto M, Azevedo TR, Kern LB, Fazolo T, de David CN, Zavaglia GO, Fernandes IR, Krauser JRM, Stein RT, Scotta MC. Rhinovirus as the main co-circulating virus during the COVID-19 pandemic in children. *J Pediatr (Rio J).* 2022 Nov-Dec;98(6):579-586. doi: 10.1016/j.jpmed.2022.03.003. Epub 2022 Apr 19. PMID: 35490727; PMCID: PMC9015957.
100. Virant MJ, Luštrek M, Kogoj R, Petrovec M, Uršič T. Changes in HRSV Epidemiology but Not Circulating Variants in Hospitalized Children due to the Emergence of SARS-CoV-2. *Viruses.* 2023 May 23;15(6):1218. doi: 10.3390/v15061218. PMID: 37376518; PMCID: PMC10302487.



101. Vittucci AC, Piccioni L, Coltella L, Ciarlito C, Antilici L, Bozzola E, Midulla F, Palma P, Perno CF, Villani A. The Disappearance of Respiratory Viruses in Children during the COVID-19 Pandemic. *Int J Environ Res Public Health*. 2021 Sep 10;18(18):9550. doi: 10.3390/ijerph18189550. PMID: 34574472; PMCID: PMC8467075.
102. Wang L, Yang S, Yan X, Liu T, Feng Z, Li G. Comparing the yield of oropharyngeal swabs and sputum for detection of 11 common pathogens in hospitalized children with lower respiratory tract infection. *Virol J*. 2019 Jun 24;16(1):84. doi: 10.1186/s12985-019-1177-x. PMID: 31234918; PMCID: PMC6591818.
103. Watanabe RAS, Cruz JS, de Souza Luna LK, Alves VRG, Conte DD, Lyra L, Nishiyama F, Camargo BS, Bellei N. Respiratory syncytial virus: viral load, viral decay, and disease progression in children with bronchiolitis. *Braz J Microbiol*. 2022 Sep;53(3):1241-1247. doi: 10.1007/s42770-022-00742-0. Epub 2022 Apr 1. PMID: 35362939; PMCID: PMC9433556.
104. Weldetsadik AY, Riedel F. Respiratory syncytial virus in severe lower respiratory infections in previously healthy young Ethiopian infants. *BMC Pediatr*. 2021 Apr 28;21(1):201. doi: 10.1186/s12887-021-02675-3. PMID: 33910510; PMCID: PMC8080344.
105. Wen S, Yu M, Zheng G, Lv F, Chen X, Lin L, Li C, Zhang H. Changes in the etiology of viral lower respiratory tract infections in hospitalized children in Wenzhou, China: 2008-2017. *J Med Virol*. 2020 Aug;92(8):982-987. doi: 10.1002/jmv.25660. Epub 2020 Jan 17. PMID: 31889316.
106. Windsor WJ, Lamb MM, Dominguez SR, Mistry RD, Rao S. Clinical characteristics and illness course based on pathogen among children with respiratory

- illness presenting to an emergency department. *J Med Virol.* 2022 Dec;94(12):6103-6110. doi: 10.1002/jmv.28031. Epub 2022 Aug 4. PMID: 35882541.
107. Xia J, Zhu Y, Bi H, Wu X, Hao M, Chen J, Wu C. Respiratory virus infections among hospitalized children aged 7 years and younger in Wuhan, China, 2017-2021. *J Infect.* 2023 Jan;86(1):e1-e4. doi: 10.1016/j.jinf.2022.08.044. Epub 2022 Sep 8. PMID: 36087744; PMCID: PMC9451932.
  108. Xu M, Liu P, Su L, Cao L, Zhong H, Lu L, Jia R, Xu J. Comparison of Respiratory Pathogens in Children With Lower Respiratory Tract Infections Before and During the COVID-19 Pandemic in Shanghai, China. *Front Pediatr.* 2022 Jun 30;10:881224. doi: 10.3389/fped.2022.881224. PMID: 35844747; PMCID: PMC9279931.
  109. Yan Y, Sun J, Ji K, Guo J, Han L, Li F, Sun Y. High incidence of the virus among respiratory pathogens in children with lower respiratory tract infection in northwestern China. *J Med Virol.* 2023 Jan;95(1):e28367. doi: 10.1002/jmv.28367. PMID: 36458544; PMCID: PMC9877598.
  110. Ye Q, Liu H. Impact of non-pharmaceutical interventions during the COVID-19 pandemic on common childhood respiratory viruses - An epidemiological study based on hospital data. *Microbes Infect.* 2022 Feb;24(1):104911. doi: 10.1016/j.micinf.2021.104911. Epub 2021 Dec 3. PMID: 34871774; PMCID: PMC8641407.
  111. Zhao T, Ye Z, Wang B, Cui Y, Nie Y, Yang B, Chen K, Zhang H, Hu F, Yu F. Virus isolation and genotype identification of human respiratory syncytial virus in Guizhou Province, China. *Braz J Infect Dis.* 2019 Nov-Dec;23(6):427-434. doi:

10.1016/j.bjid.2019.10.007. Epub 2019 Nov 14. PMID: 31734172; PMCID: PMC9428243.

112. Zhao X, Wang C, Jiang H, Zhang H, Fang F, Chen M, Yuan Z, Teng Z, Liu J, Zhang X. Analysis of circulating respiratory syncytial virus A strains in Shanghai, China identified a new and increasingly prevalent lineage within the dominant ON1 genotype. *Front Microbiol.* 2022 Aug 11;13:966235. doi: 10.3389/fmicb.2022.966235. PMID: 36033866; PMCID: PMC9403419.
